# Supplementary material for: Promiscuous CYP87A enzyme activity initiates cardenolide biosynthesis in plants
Source: PubMed Central journal article supplement (PMC10581899; doi:10.1038/s41477-023-01515-9), 2023-09-18
Supplement: 41477_2023_1515_MOESM1_ESM.pdf [file 41477_2023_1515_MOESM1_ESM.pdf]

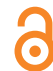

---

# Promiscuous CYP87A enzyme activity initiates cardenolide biosynthesis in plants

---

In the format provided by the authors and unedited

---

Sterol precursor  
(Cholesterol or  
phytosterols)

CYPs ?

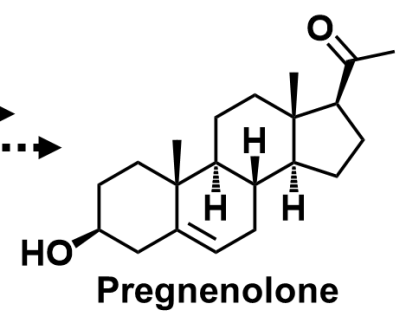

3βHSD

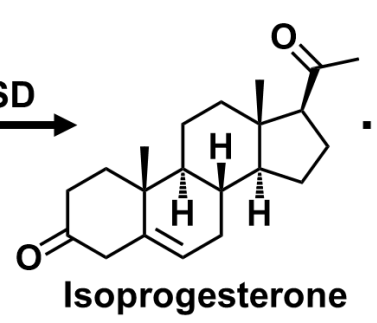

3-KSI ?

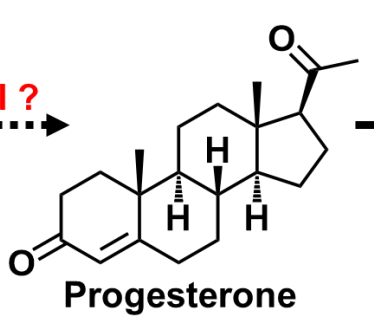

P5βR

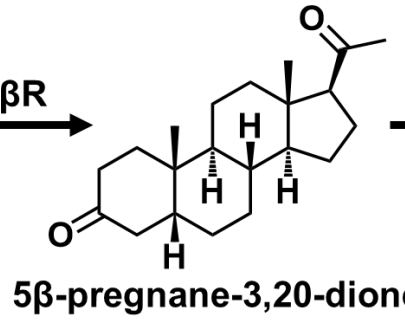

3βHSD

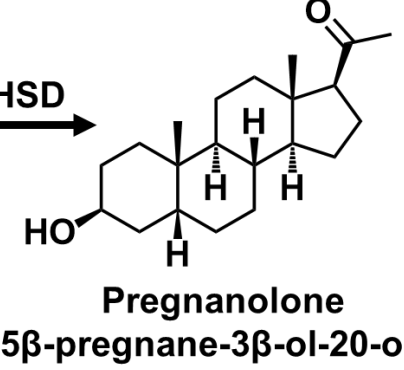

C14  
Hydroxylase ?

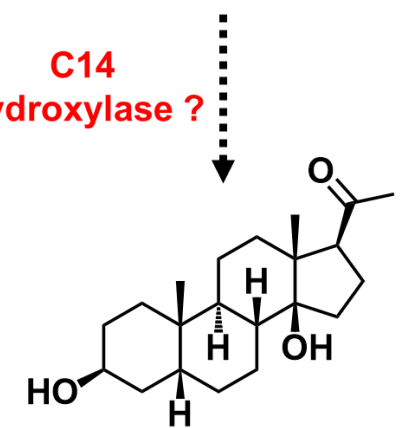

C21  
Hydroxylase ?

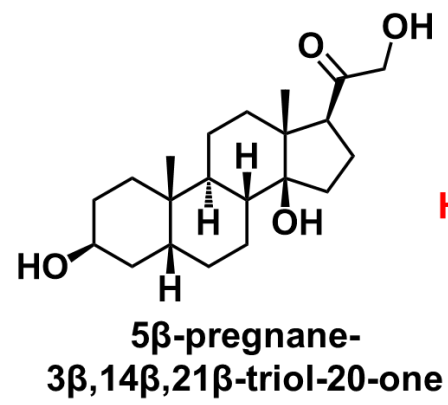

Malonyl  
transferase ?

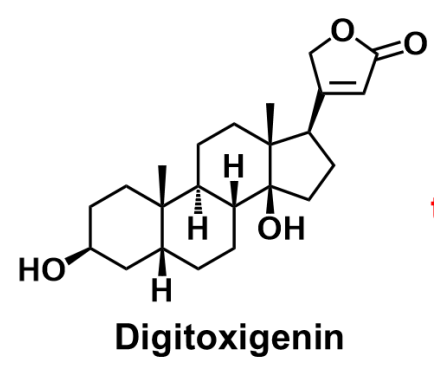

UGTs??

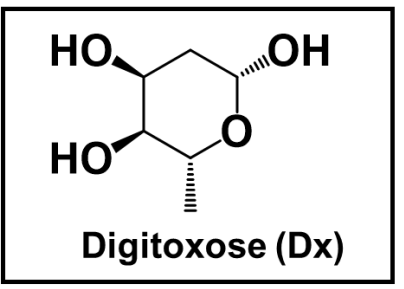

Dx-Dx-Dx-O

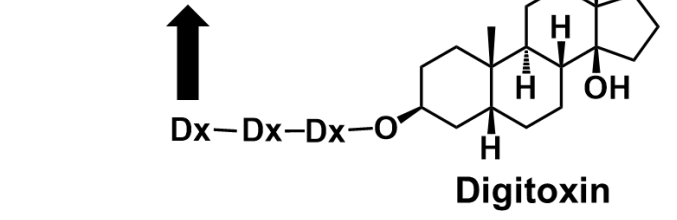

**Supplementary Fig. 1: Cardenolide biosynthesis in *D. purpurea* plants.** Predicted steps towards formation of digitoxin from suggested sterol precursor are presented as a representative example. Formation of pregnenolone is the first committed step in cardenolide biosynthesis in plants. The unknown steps (dashed arrows) and corresponding hypothesized enzymes (in red) are shown. Known biosynthetic enzymes (solid arrows) are marked in black. 3 $\beta$ HSD, 3 $\beta$ -hydroxysteroid dehydrogenase; P5 $\beta$ R, progesterone 5 $\beta$ -reductase; 3-KSI, 3-ketosteroid isomerase; UGTs, UDP-glycosyltransferases.

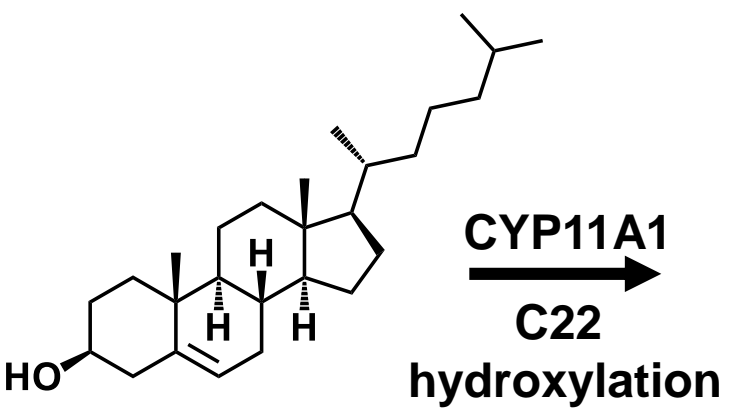

**Cholesterol**

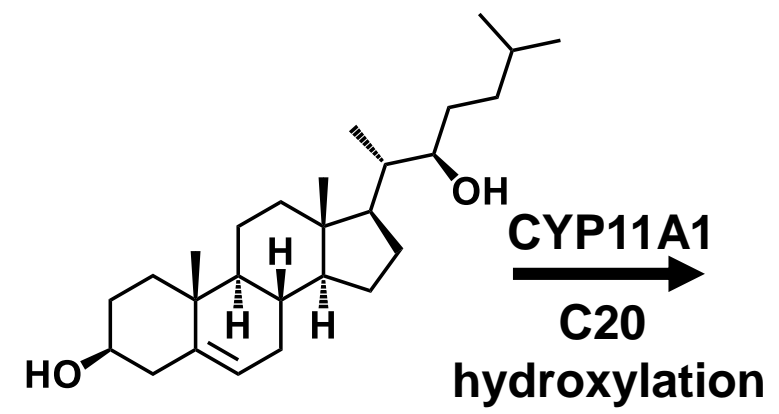

**22*R*-hydroxycholesterol**

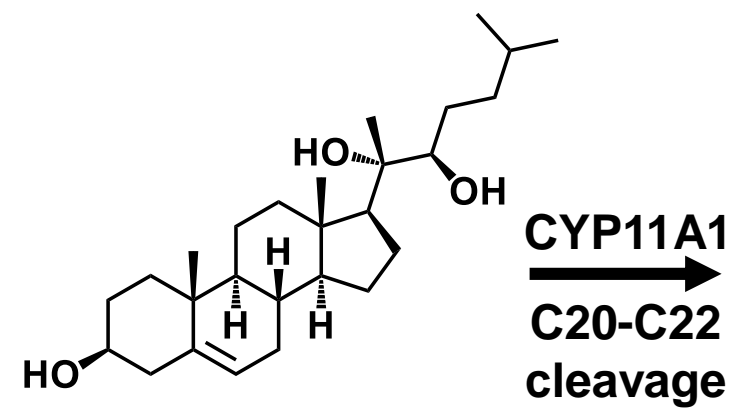

**20*R*,22*R*-dihydroxycholesterol**

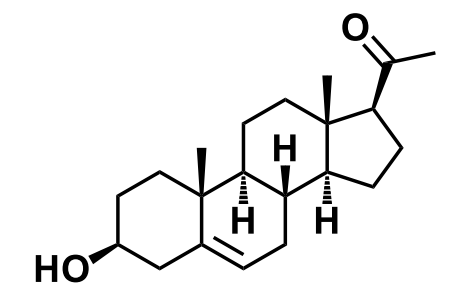

**Pregnenolone**

**Supplementary Fig. 2:** Three step reaction sequence catalyzed by CYP11A1 (solid black arrows) during conversion of cholesterol to pregnenolone.

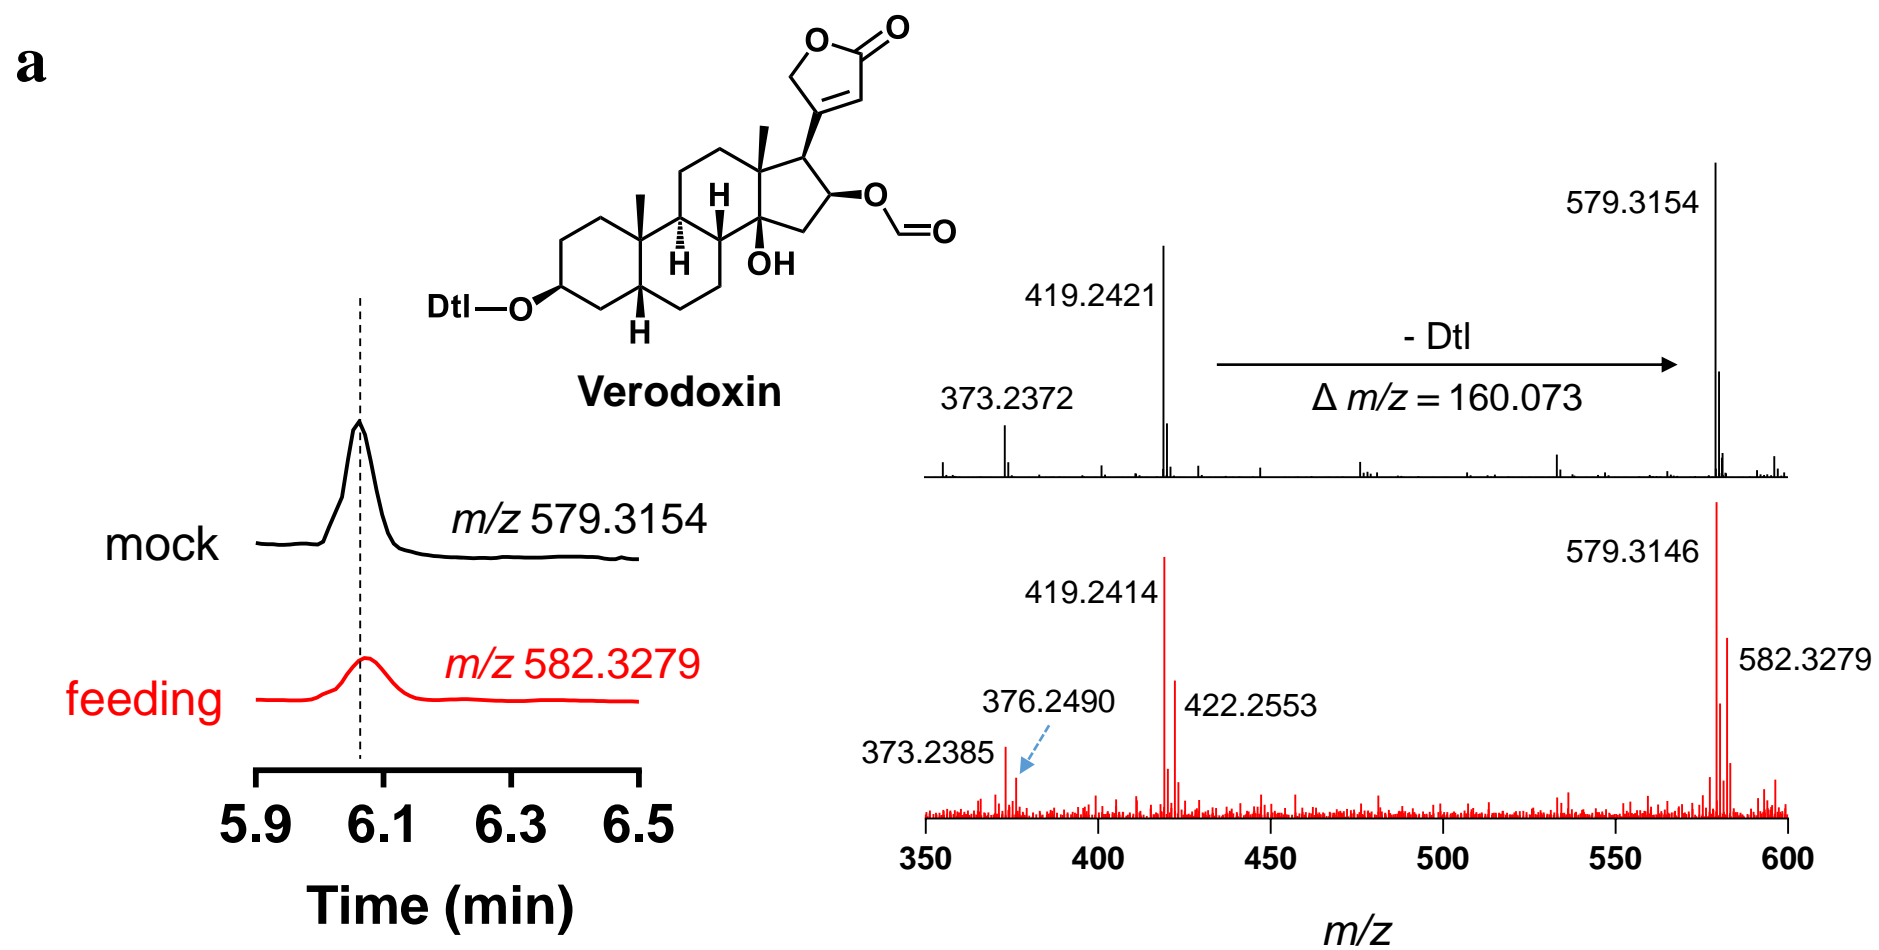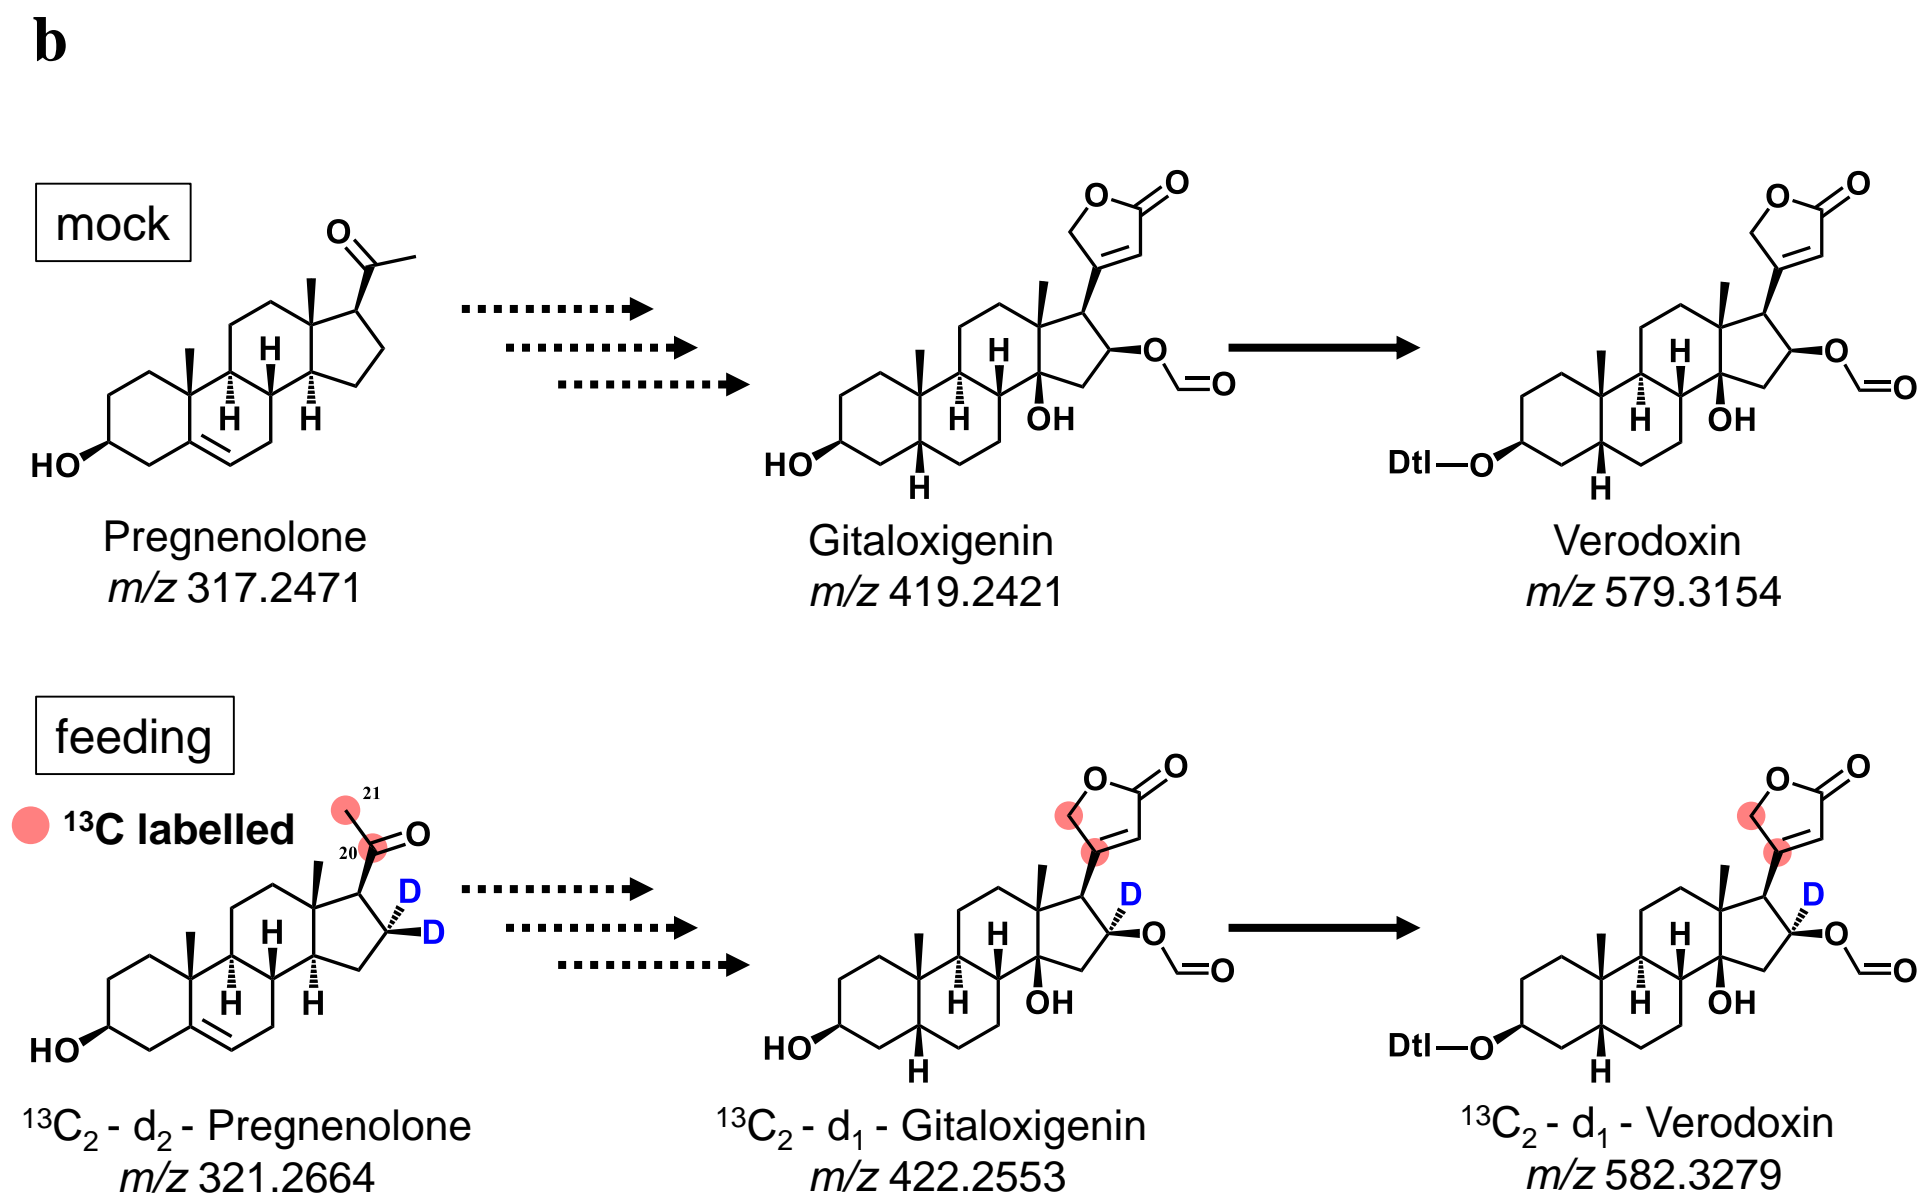

**Supplementary Fig. 3: Incorporation of pregnenolone to verodoxin as demonstrated by stable isotope labelled feeding studies.** LC-MS analysis of verodoxin after feeding of labelled pregnenolone ( $^{13}\text{C}_2(20,21)$ -16,16- $\text{D}_2$ -pregnenolone) to in vitro grown 4-week old *D. purpurea*. **(a)** Comparison of extracted ion chromatograms (left) and corresponding MS/MS fragmentation spectra (right) in feeding (treated with labelled pregnenolone, in red) and mock (treated with deionized water, in black) samples respectively. **(b)** Structures of putative ion fragments generated in MS/MS analysis for verodoxin in mock and feeding samples. Mass to charge ( $m/z$ ) ions are indicated for verodoxin under feeding and mock treatments. Dtl: digitalose.

**a*****D. purpurea***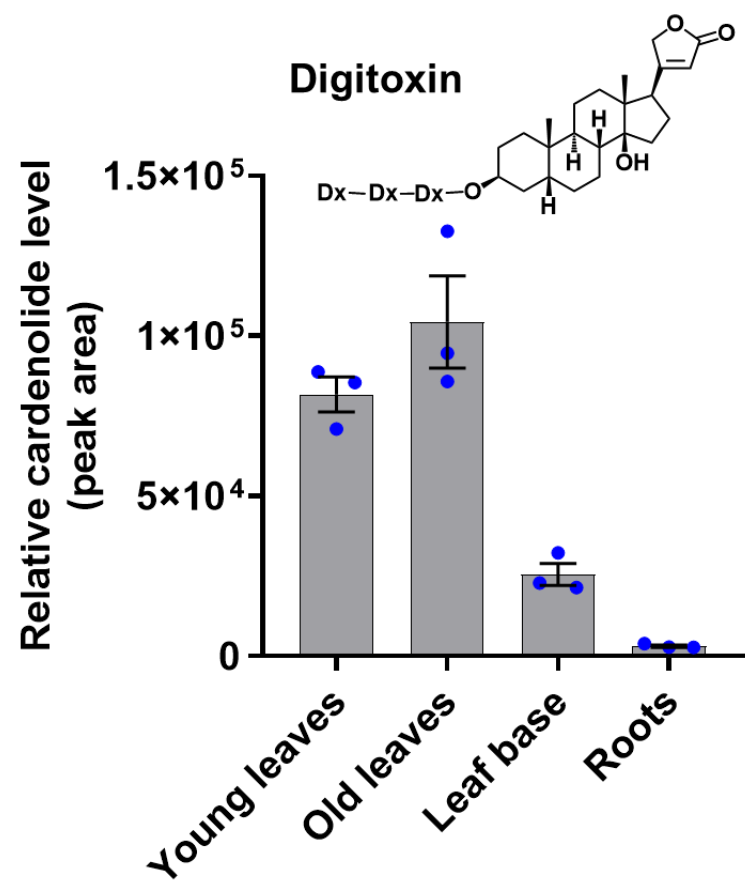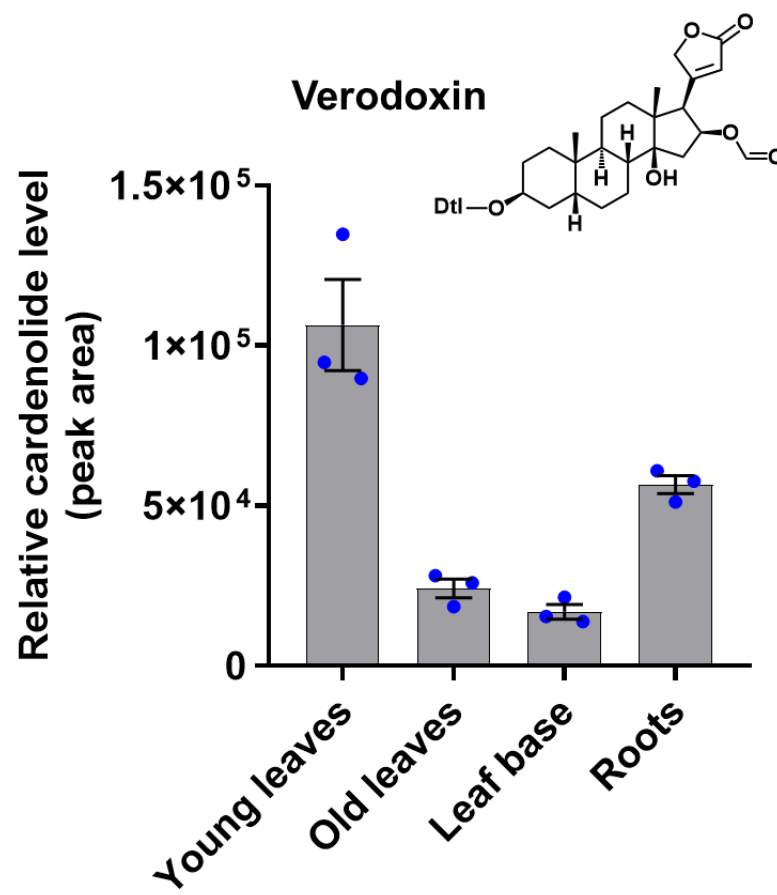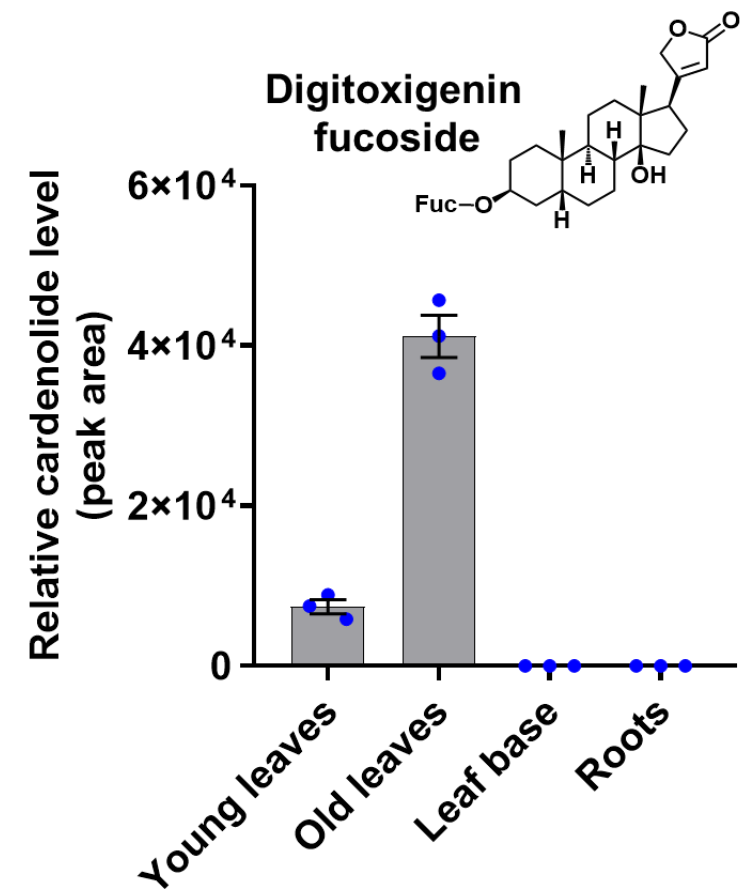**b*****C. procera***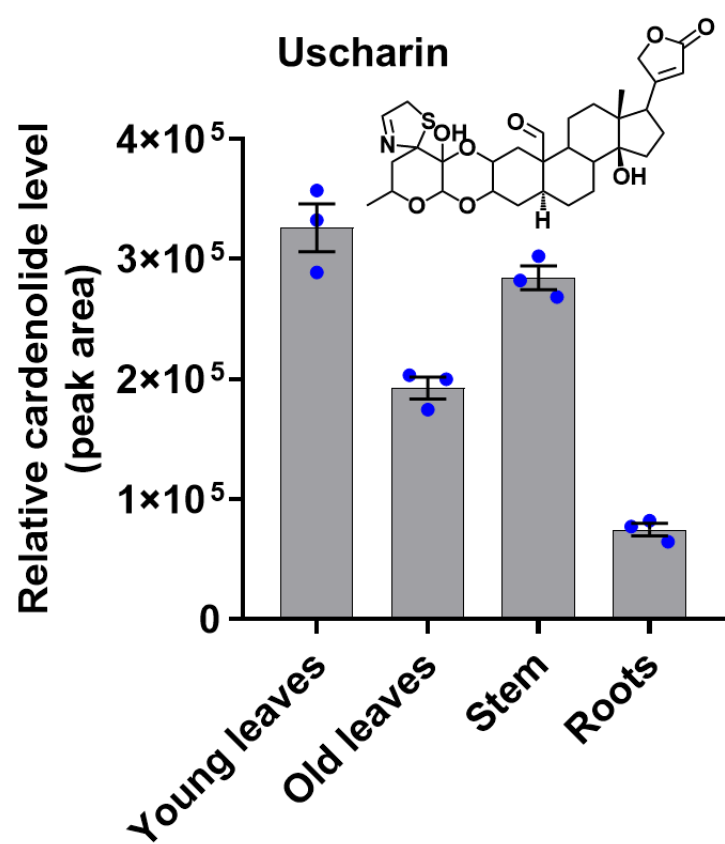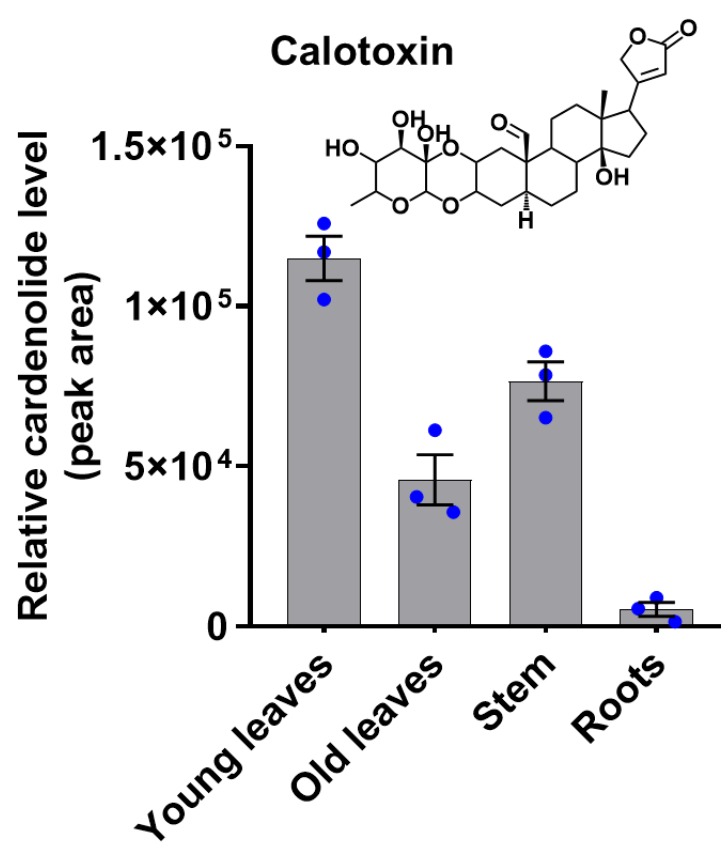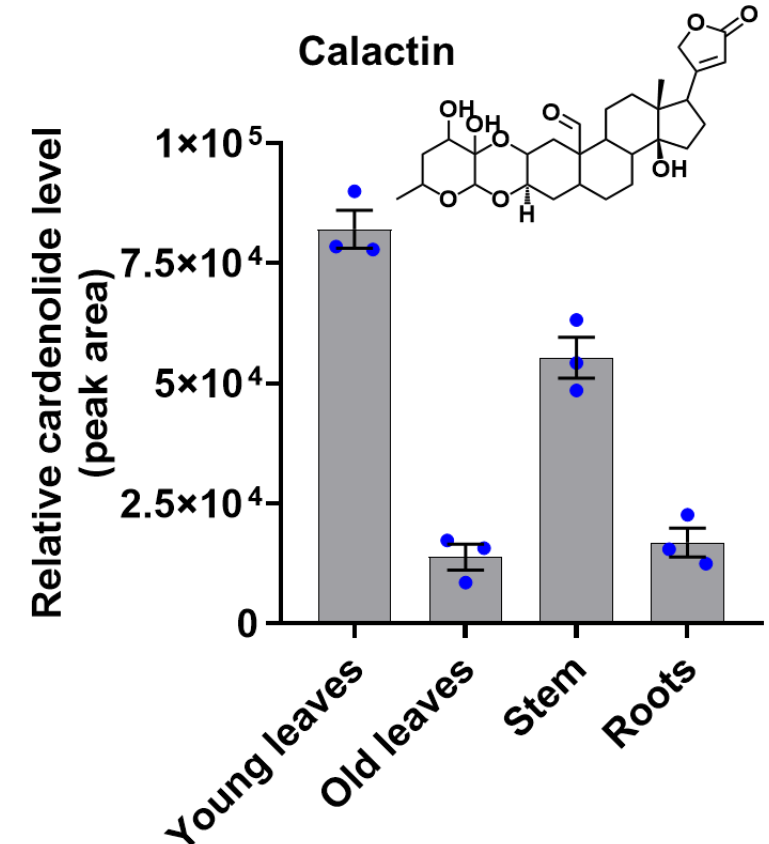



**Supplementary Fig. 4: LC-MS based profiling of selected cardenolides in different tissues of *D. purpurea* (a) and *C. procera* (b).** The peak areas for each cardenolide were determined using the Bruker Compass Data Analysis (Version 5.3) software. The values indicate means of biological replicates  $\pm$  standard error mean (n=3). Dx: digitoxose; Dtl: digitalose; Fuc: fucose.

*D. purpurea*

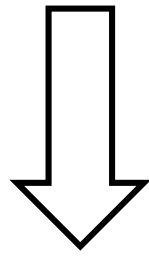

Young leaves  
Old leaves  
Leaf base  
Roots

|                  |     |     |     |        |
|------------------|-----|-----|-----|--------|
| <b>CYP87A106</b> | 503 | 753 | 455 | 8e-002 |
| <b>CYP716E70</b> | 203 | 192 | 95  | 1      |
| <b>CYP94A142</b> | 51  | 34  | 73  | 4      |
| <b>CYP716E72</b> | 67  | 220 | 50  | 7      |
| <b>CYP716E71</b> | 49  | 111 | 41  | 0      |
| <b>CYP90A101</b> | 34  | 34  | 31  | 3      |
| <b>CYP71A142</b> | 37  | 55  | 36  | 1      |
| <b>CYP71A141</b> | 23  | 45  | 36  | 9e-002 |
| <b>CYP94D184</b> | 28  | 33  | 31  | 4      |
| <b>CYP82Z2</b>   | 35  | 50  | 33  | 2      |
| <b>CYP77A92</b>  | 41  | 24  | 27  | 2      |
| <b>CYP93B89</b>  | 76  | 42  | 77  | 5      |
| <b>CYP77B72</b>  | 45  | 1   | 8   | 3e-002 |

Min. Max.

*C. procera*

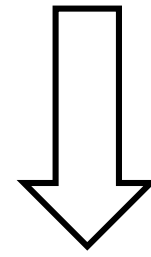

Young leaves  
Old leaves  
Stem  
Roots

|                 |     |     |    |        |
|-----------------|-----|-----|----|--------|
| <b>CYP77B68</b> | 193 | 0   | 0  | 1e-001 |
| <b>CYP90A95</b> | 88  | 116 | 74 | 22     |
| <b>CYP86A8</b>  | 116 | 13  | 6  | 2      |
| <b>CYP86A22</b> | 99  | 34  | 43 | 6      |
| <b>CYP77A3</b>  | 99  | 47  | 39 | 5e-001 |

|                  |        |   |      |      |
|------------------|--------|---|------|------|
| <b>CYP87A103</b> | 1e-001 | 6 | 7397 | 5593 |
|------------------|--------|---|------|------|

Min. Max.

**Supplementary Fig. 5: Expression profile of candidate CYP genes in *D. purpurea* (left) and *C. procera* (right) different tissue types (RNA-seq expression data).** Normalized TPM (transcripts per million mapped reads) values were used to infer the expression profile. Two CYP candidates, CYP87A106 (*D. purpurea*) and CYP87A103 (*C. procera*) characterized further in this study are marked in dashed red rectangle.

**a**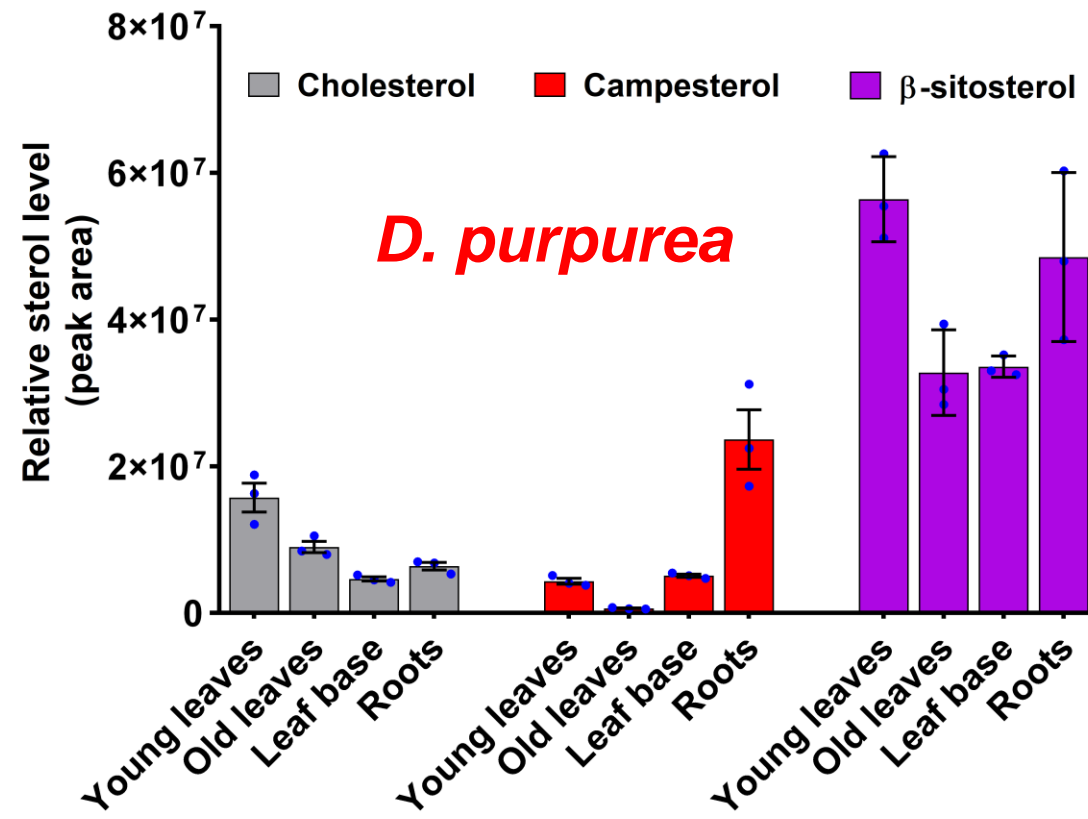**b**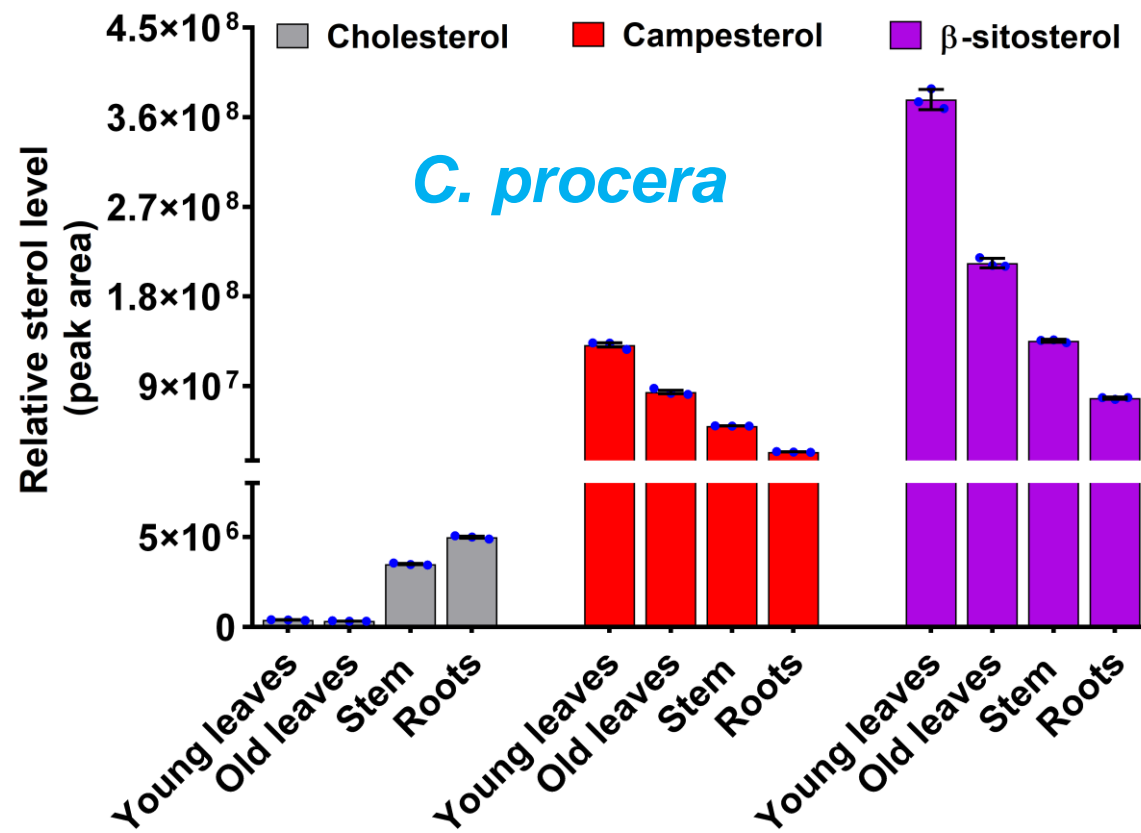

**Supplementary Fig. 6: Levels of cholesterol and phytosterols in different tissues of *D. purpurea* (a) and *C. procera* (b) as determined by GC-MS.** The values indicate means of biological replicates  $\pm$  standard error mean (n=3) obtained from three different plants.

**a**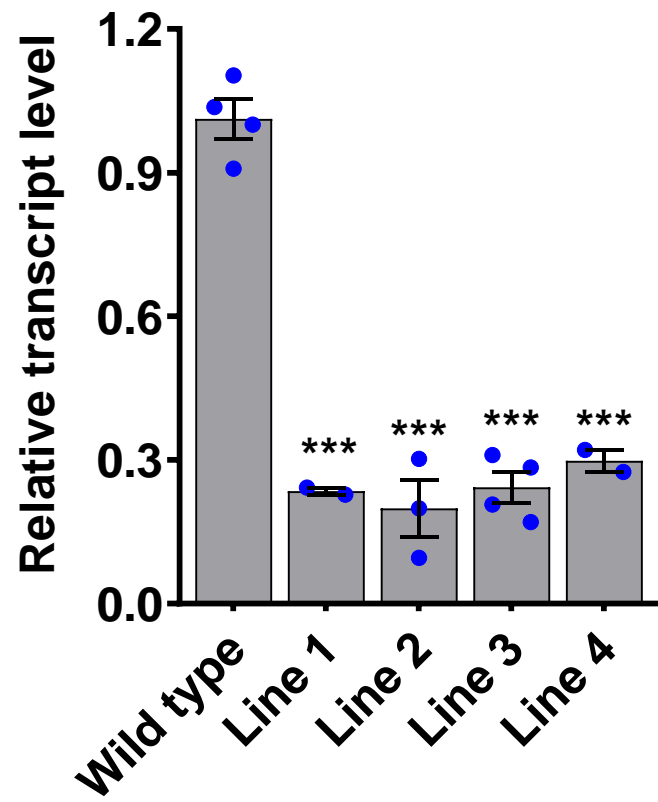**b**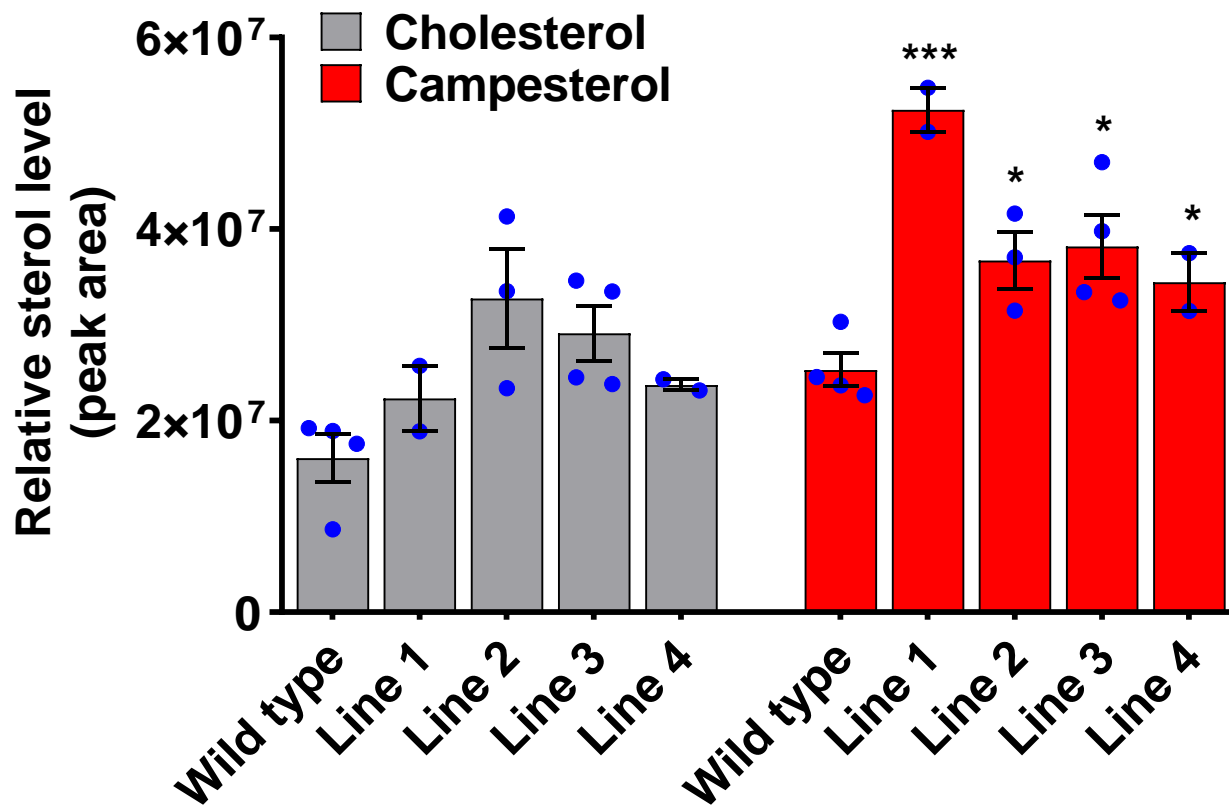

**Supplementary Fig. 7: DpCYP87A106 expression (a) and levels of cholesterol and campesterol (b) in leaves of DpCYP87A106-silenced *D. purpurea* lines (by RNAi) compared to wild type ones.** Four independent DpCYP87A106-RNAi transgenic *D. purpurea* lines (1, 2, 3 and 4) were generated after stable transformation. Values indicate means  $\pm$  standard error mean (n=4 for wild type and n  $\geq$  2 for individual transgenic lines genotype). Asterisks indicate significant changes compared to wild type samples as calculated by a two-tailed Student's t-test (\*P-value < 0.05; \*\*P-value < 0.01; \*\*\*P-value < 0.001). GC-MS was used for sterol profiling.

Sterol precursor  
(e.g. campesterol)

DpCYP87A106

3 $\beta$ HSD  
3-KSI?

P5 $\beta$ R

3 $\beta$ HSD

Cardenolides  
(e.g. digitoxin)

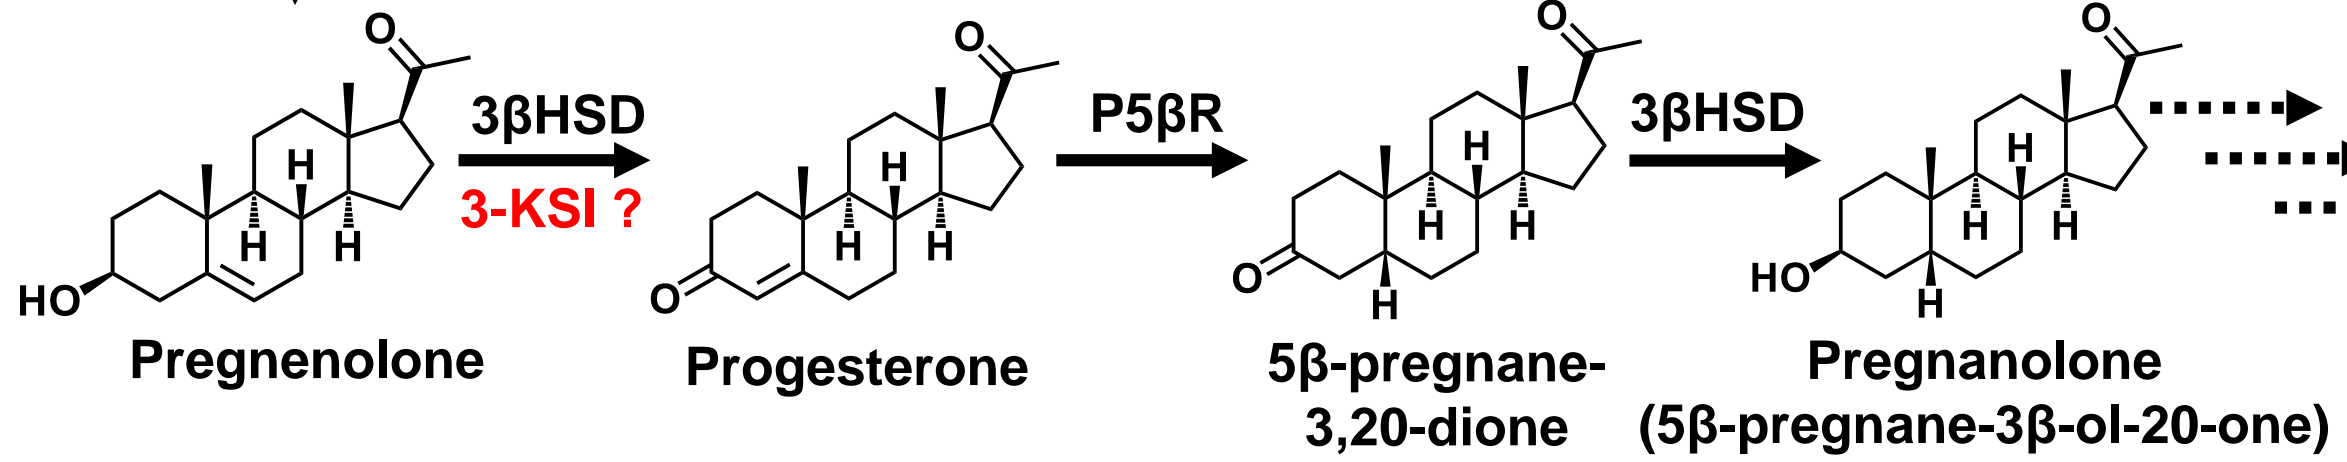

5 $\beta$ -pregnane-3 $\beta$ -ol-20-one std.

5 $\beta$ -pregnane-3,20-dione std.

Pregnenolone std.

RNAi line 2 + pregnenolone

RNAi line 1 + pregnenolone

RNAi line 2

RNAi line 1

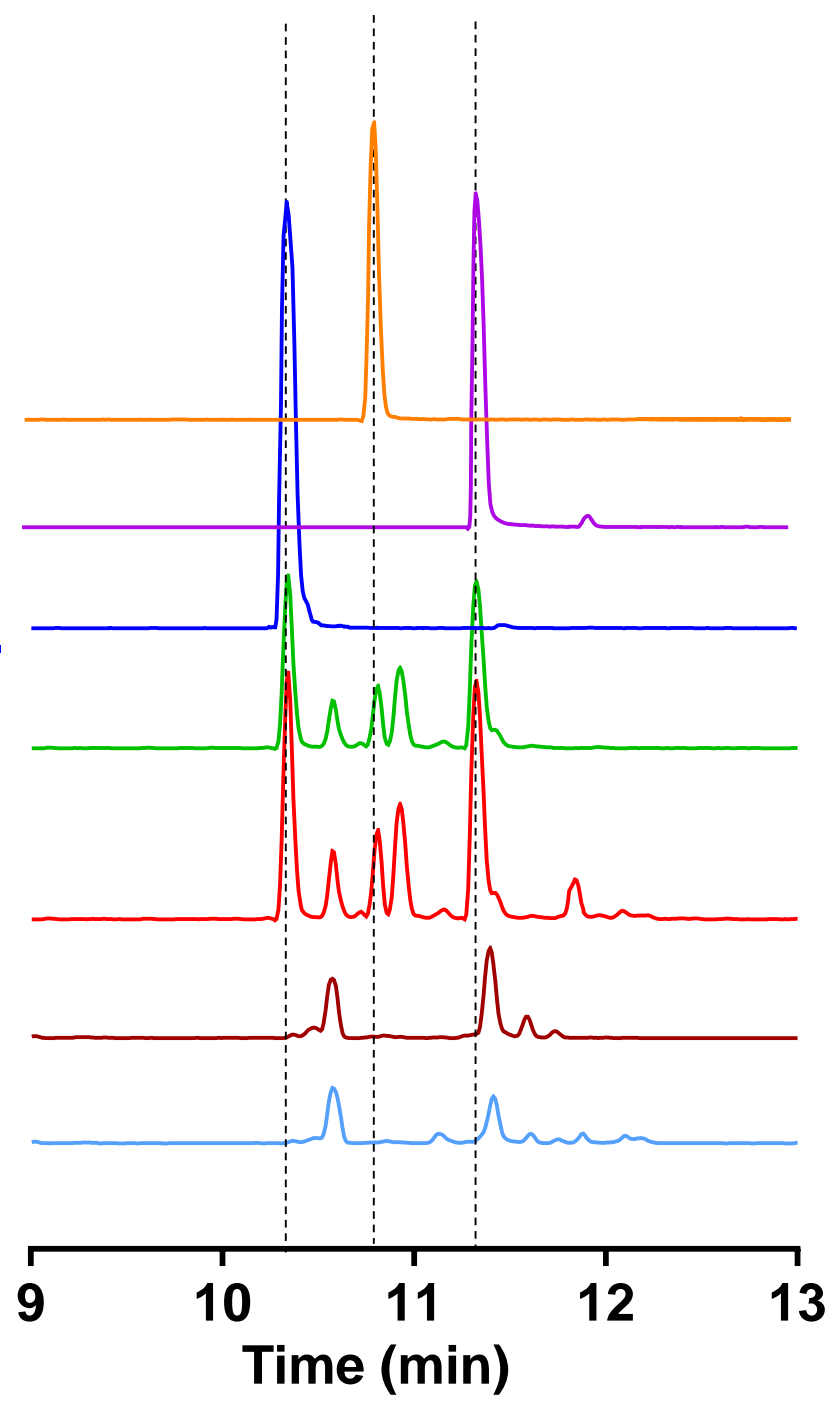



**Supplementary Fig. 8: Accumulation of cardenolide pathway intermediates (downstream of pregnenolone) following feeding of pregnenolone to DpCYP87A106-silenced *D. purpurea* lines.** Aligned extracted ion chromatograms (LC-MS) are shown for feeding (RNAi line 1 and 2 treated with pregnenolone) and control (RNAi line 1 and 2 treated with water) along with authentic sterol standards (pregnenolone, 5 $\beta$ -pregnane-3,20-dione and 5 $\beta$ -pregnane-3 $\beta$ -ol-20-one). Cut leaf disks obtained from each genotype were used in the feeding experiments. Simplified cardenolide pathway from sterol precursor is shown in the upper panel. Formation of pregnenolone catalyzed by the DpCYP87A106 is the first committed step in cardenolide biosynthesis. Known biosynthetic enzymes (in black) and hypothesized ones (in red) are marked in pathway scheme. 3 $\beta$ HSD, 3 $\beta$ -hydroxysteroid dehydrogenase; P5 $\beta$ R, progesterone 5 $\beta$ -reductase; 3-KSI, 3-ketosteroid isomerase.

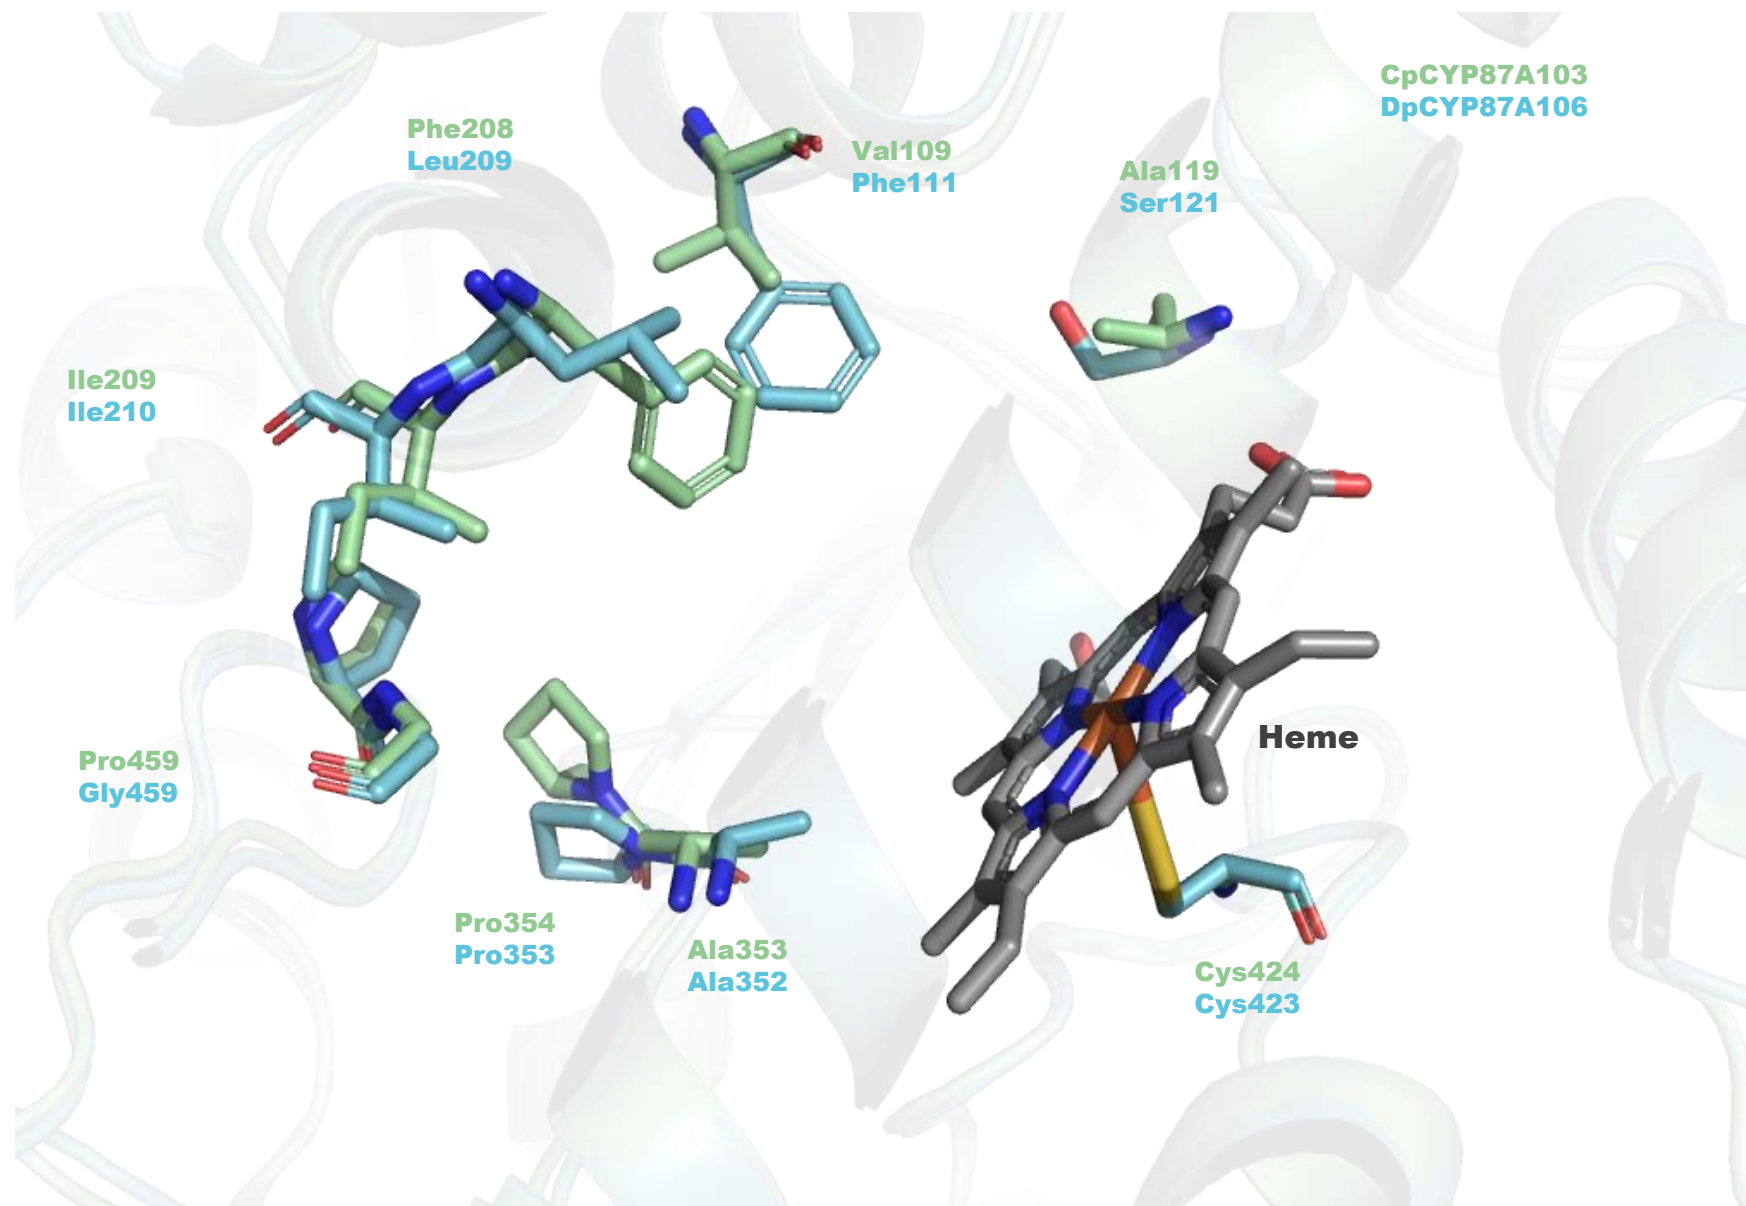

**Supplementary Fig. 9: Comparison of active site of CpCYP87A103 (green) and DpCYP87A106 (blue) docked with heme-thiolate cofactor.**

**a**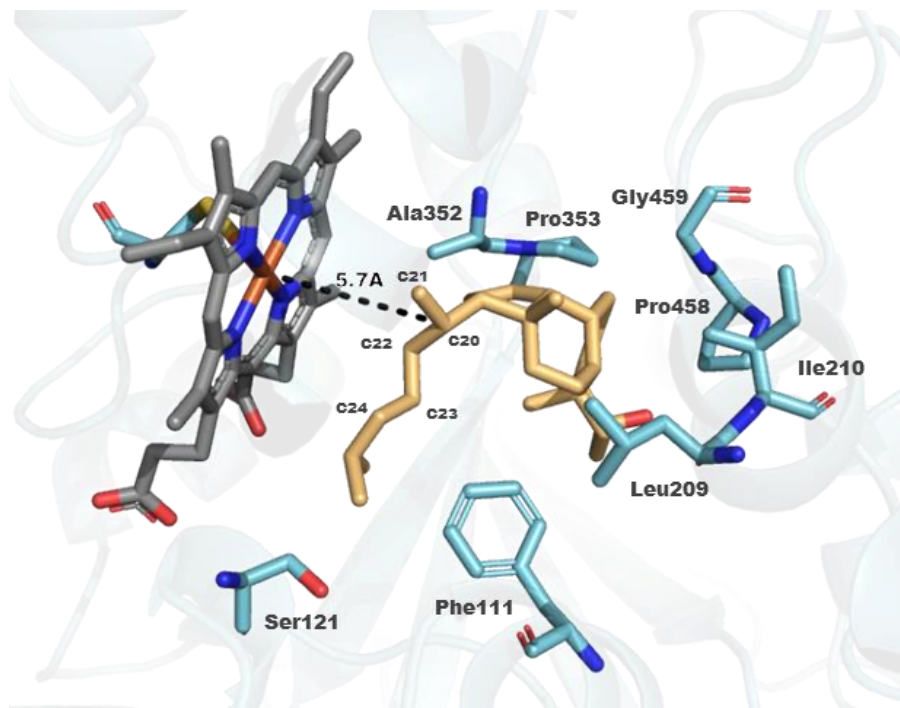**b**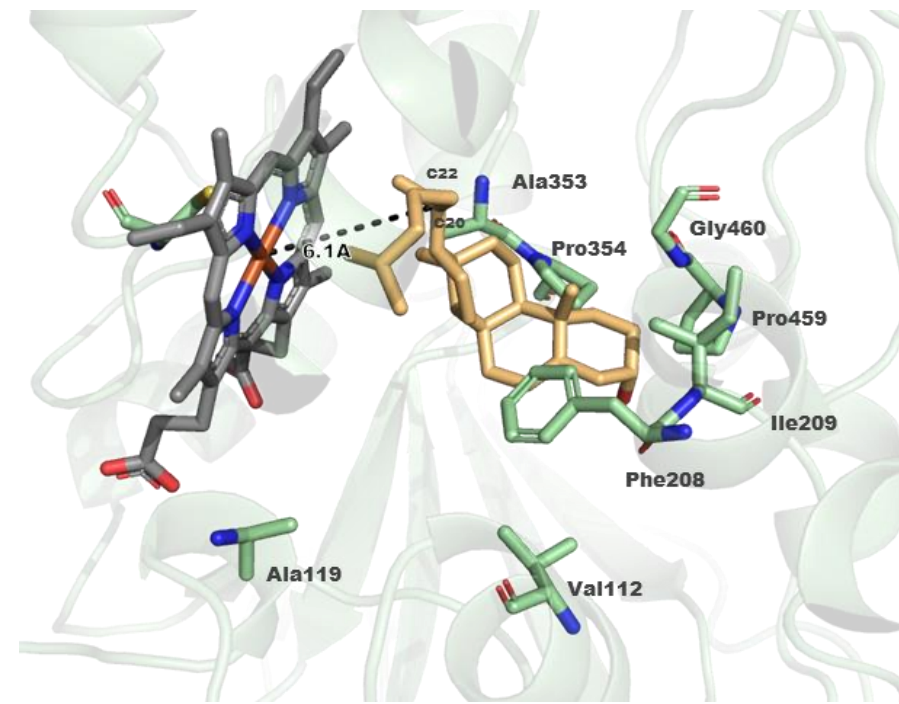**c**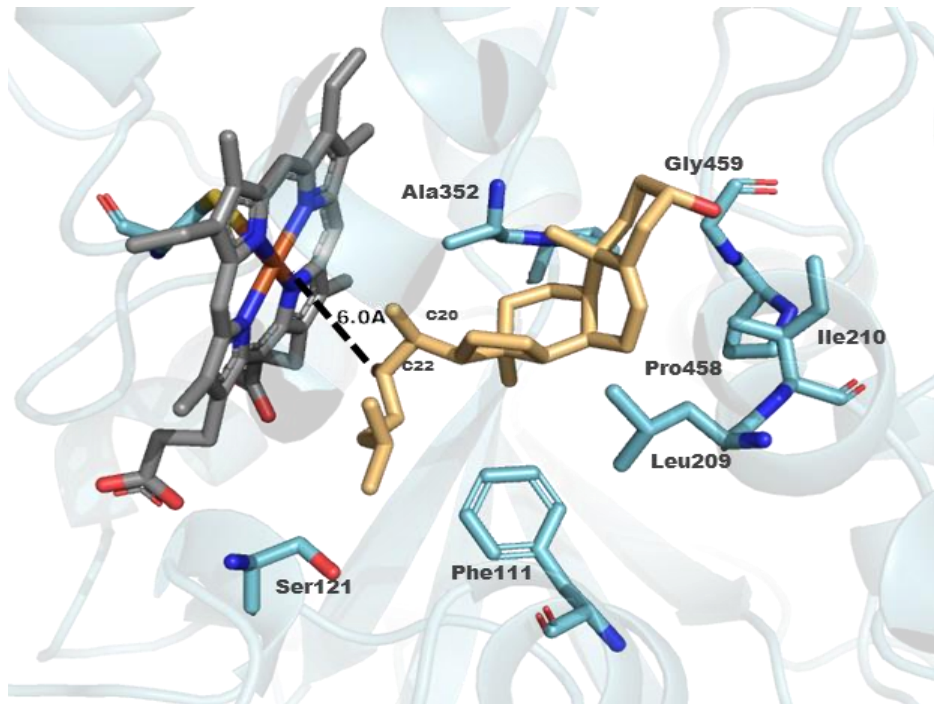**d**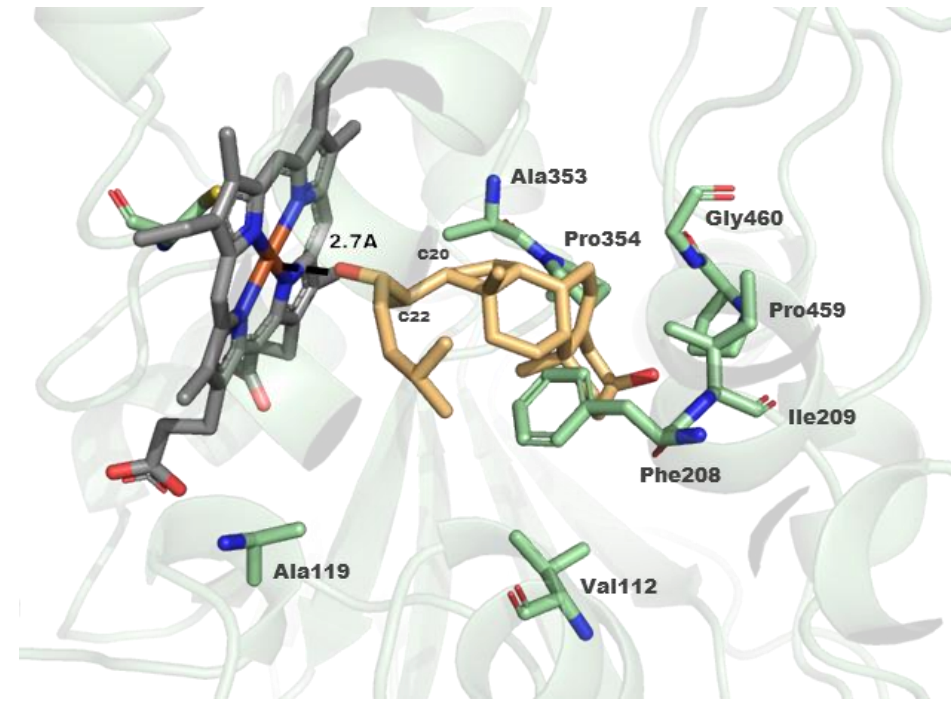**e**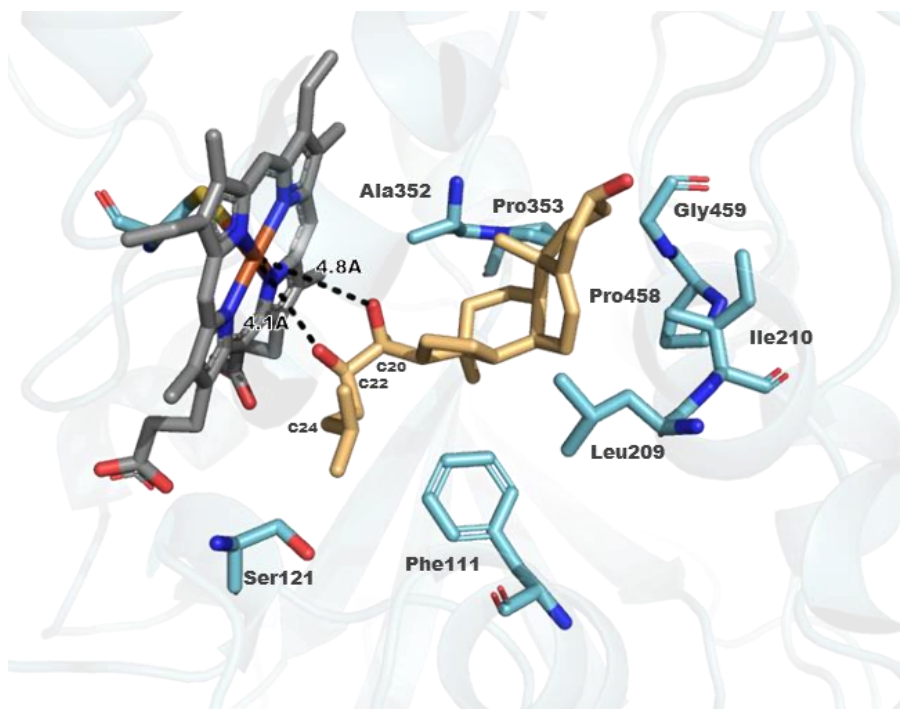**f**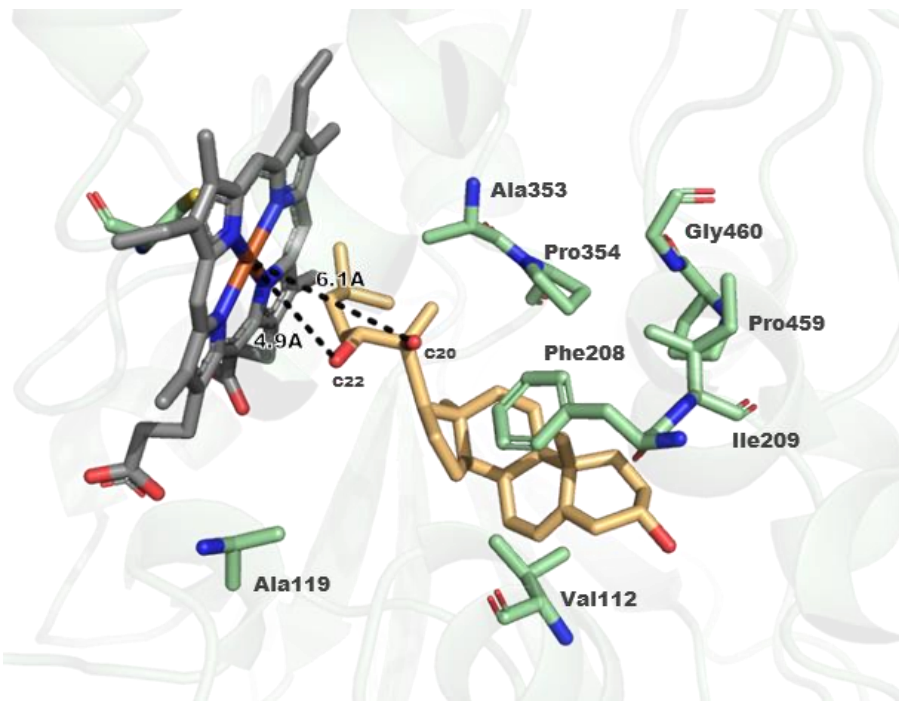

**Supplementary Fig. 10: Docking of cholesterol (a and b), 22-hydroxycholesterol (c and d) and 20,22-dihydroxycholesterol (e and f) into the active site of DpCYP87A106 and CpCYP87A103 respectively.** DpCYP87A106 and CpCYP87A103 homology models docked with heme-thiolate cofactor. Dashes represent distance between carbon undergoing hydroxylation and heme in Angstrom.

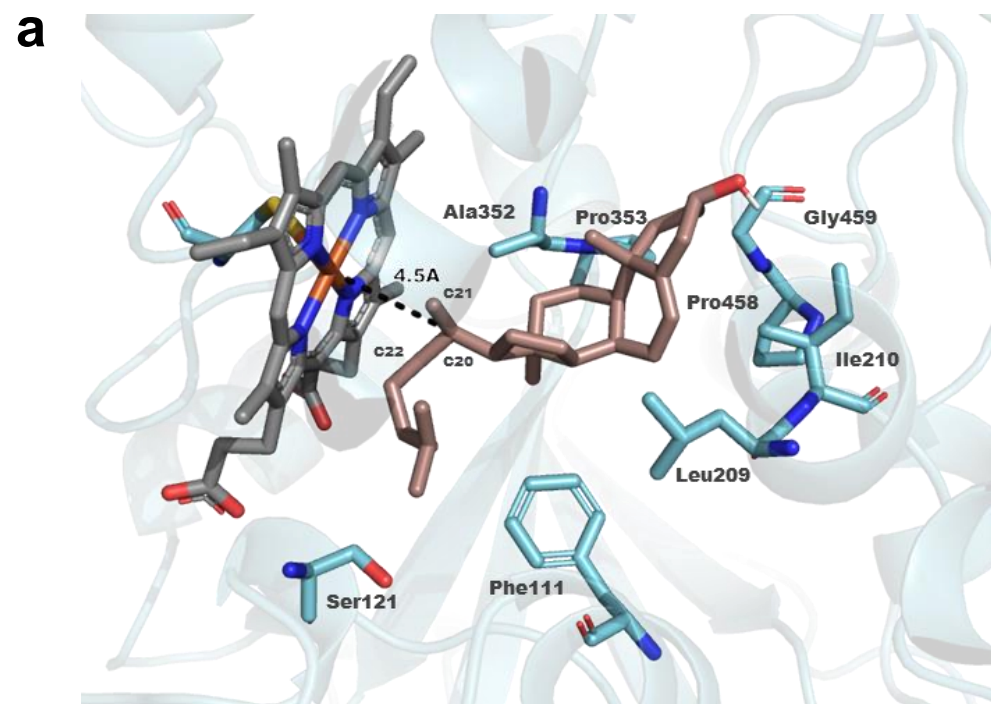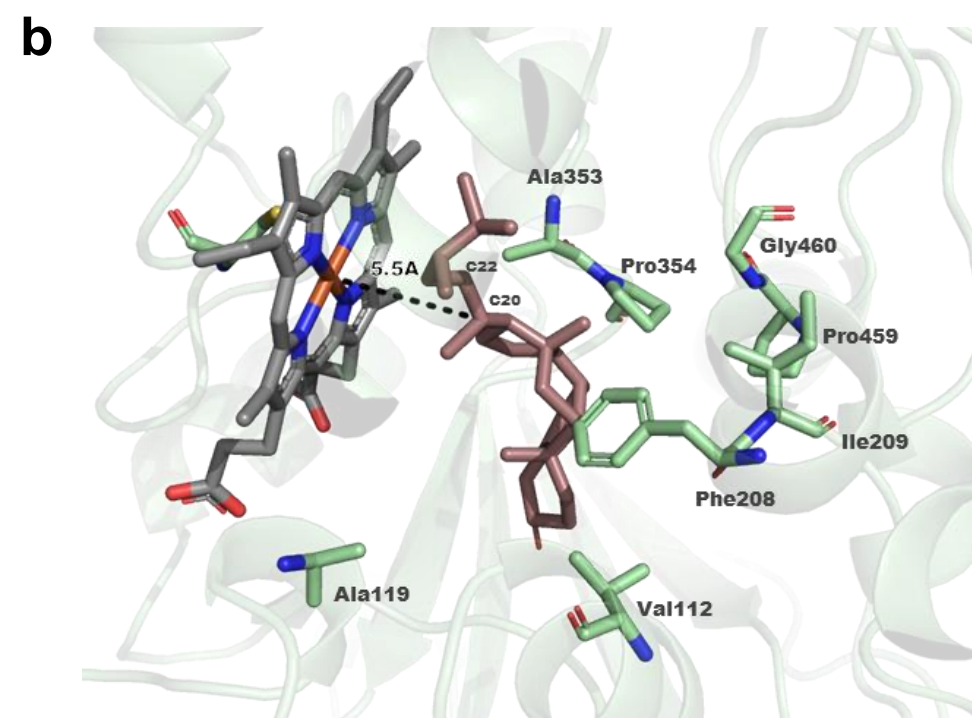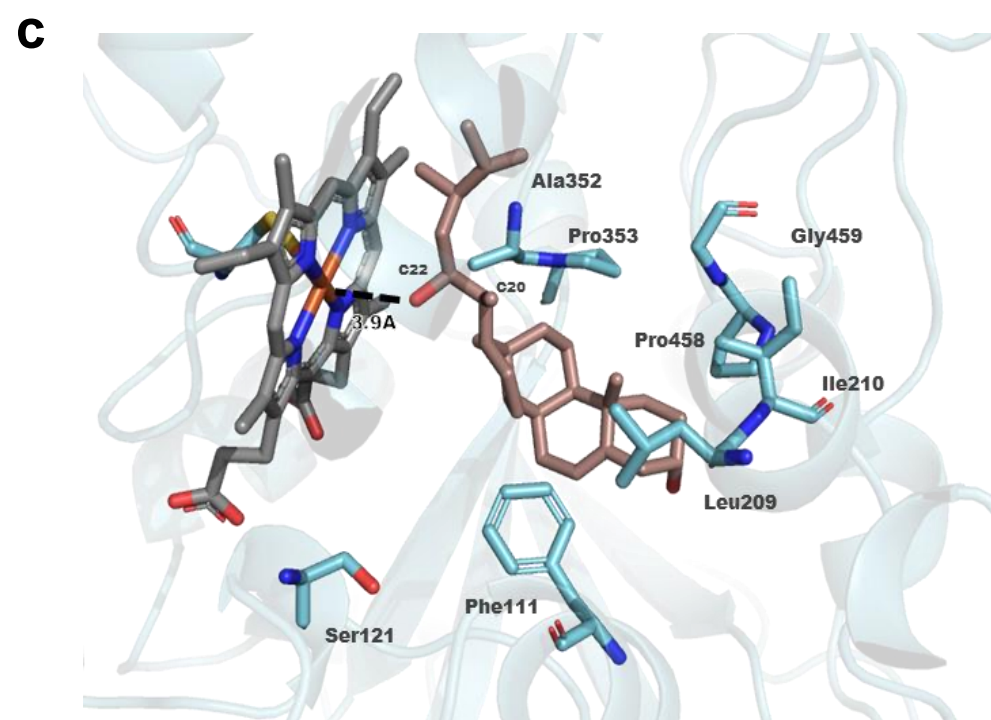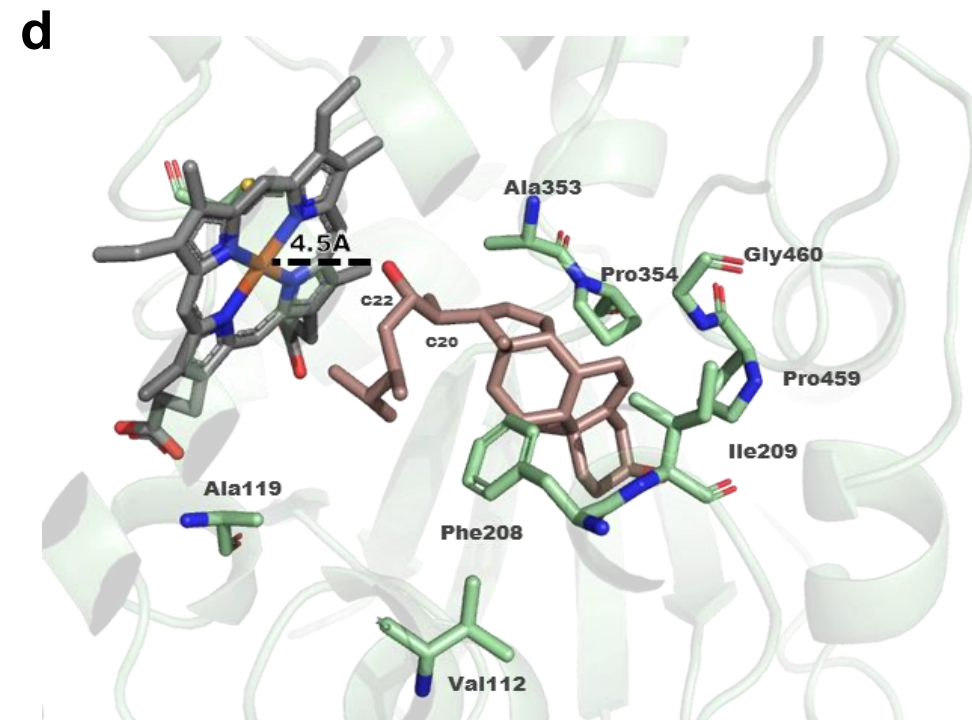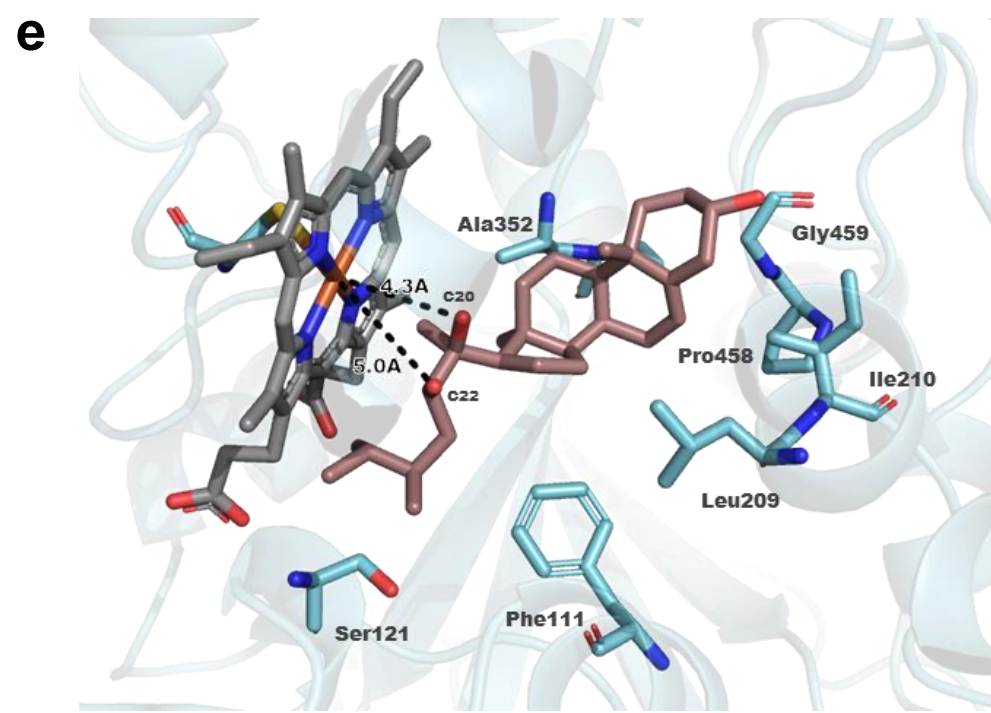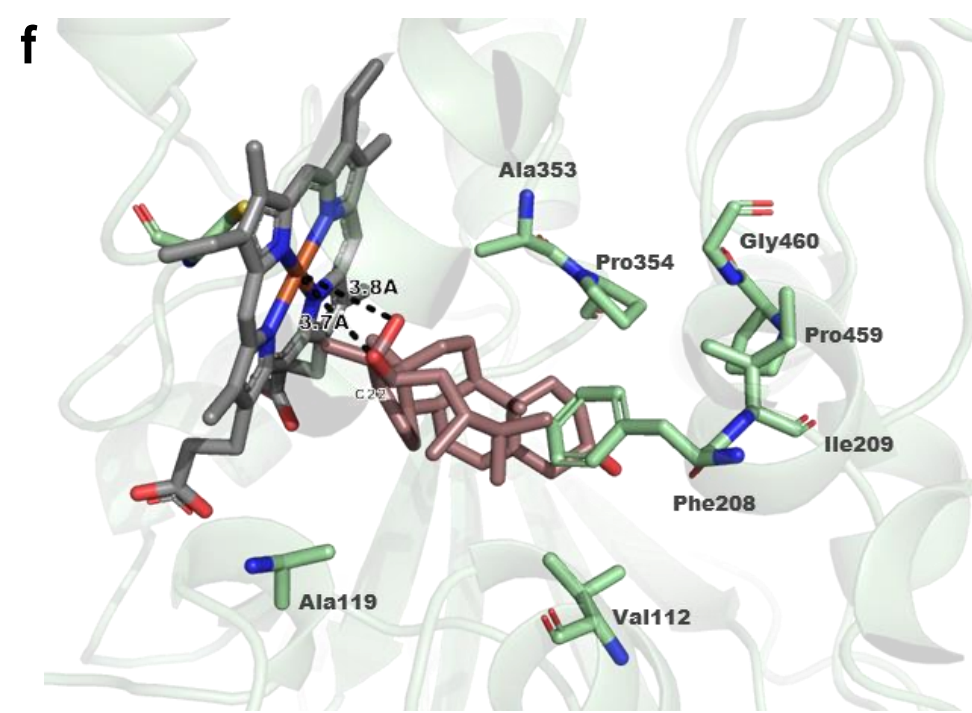

**Supplementary Fig. 11: Docking of campesterol (a and b), 22-hydroxycampesterol (c and d) and 20,22-dihydroxycampesterol (e and f) into the active site of DpCYP87A106 and CpCYP87A103 respectively.** DpCYP87A106 and CpCYP87A103 homology models docked with heme-thiolate cofactor. Dashes represent distance between carbon undergoing hydroxylation and heme in Angstrom.

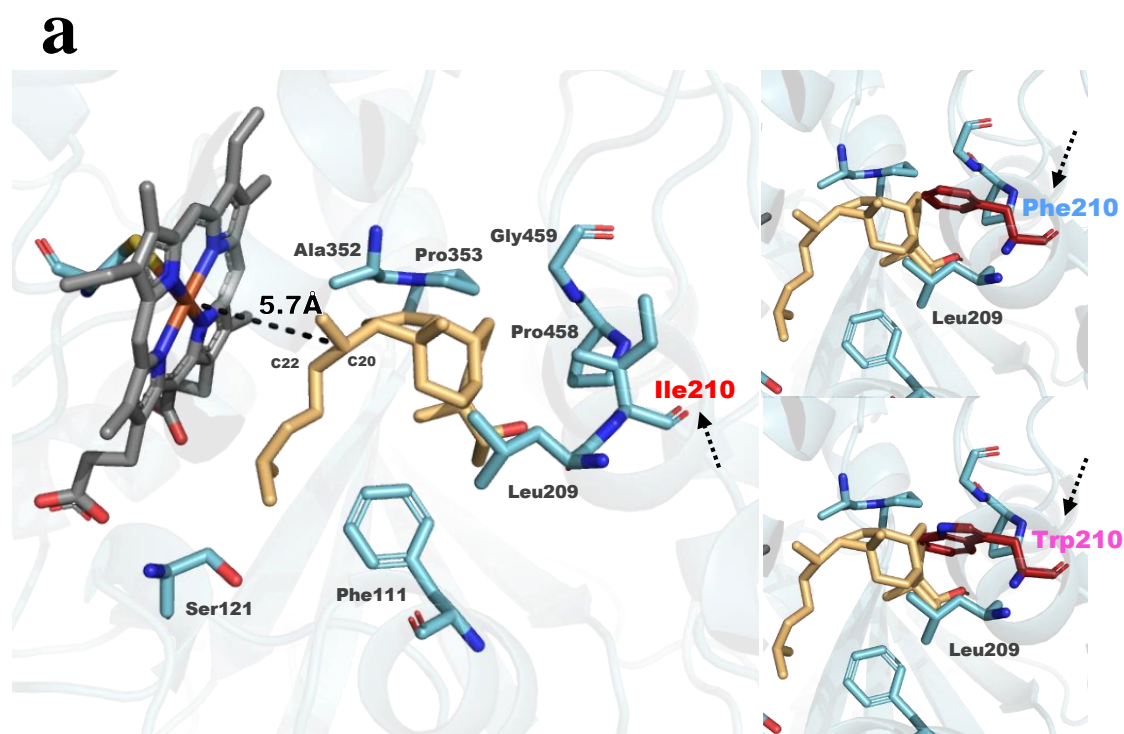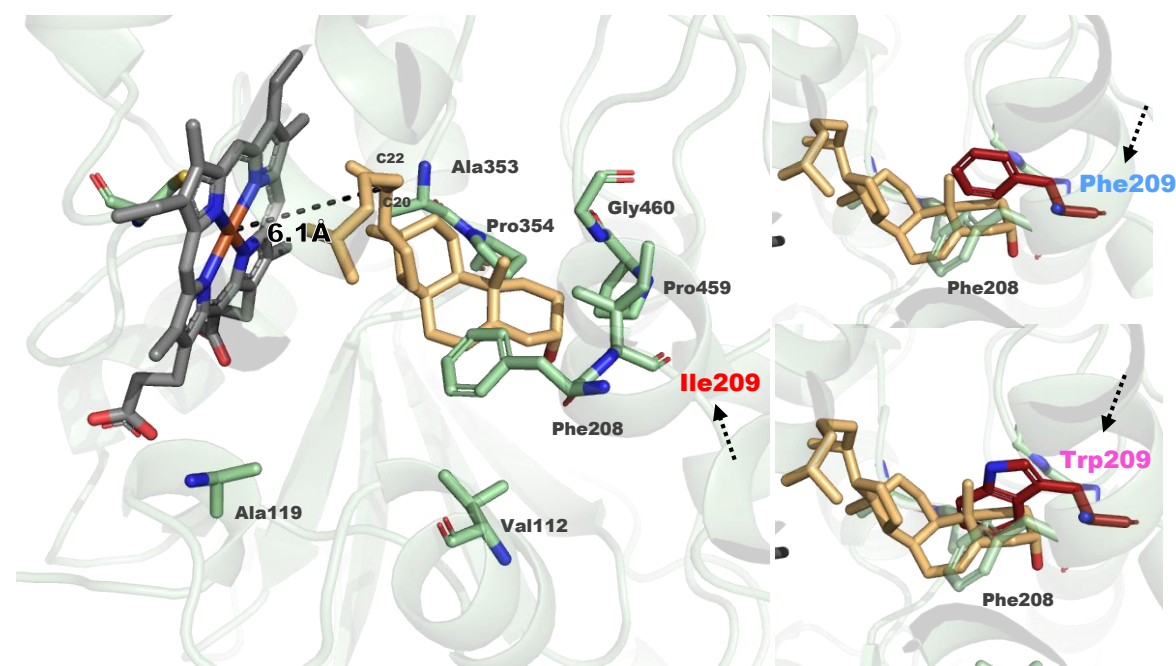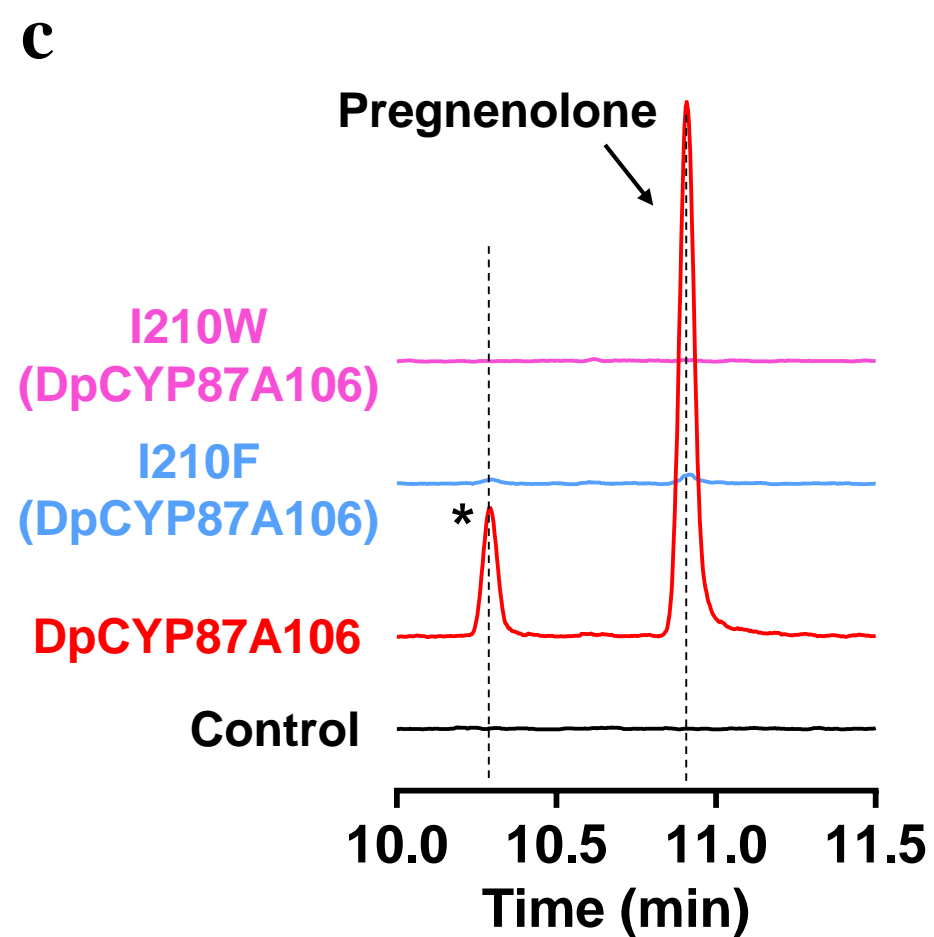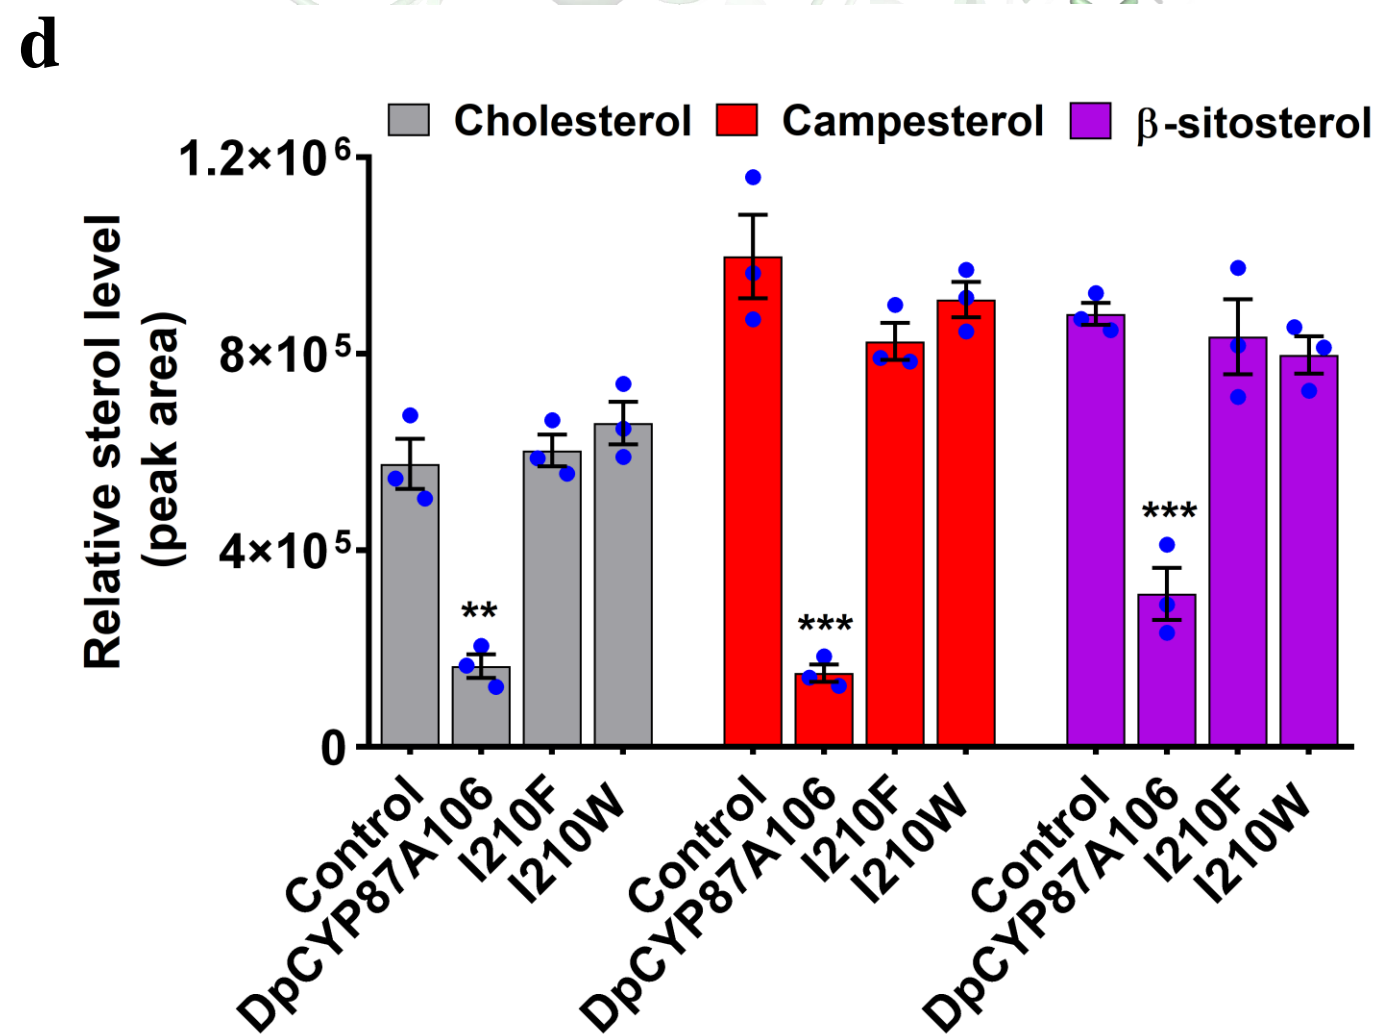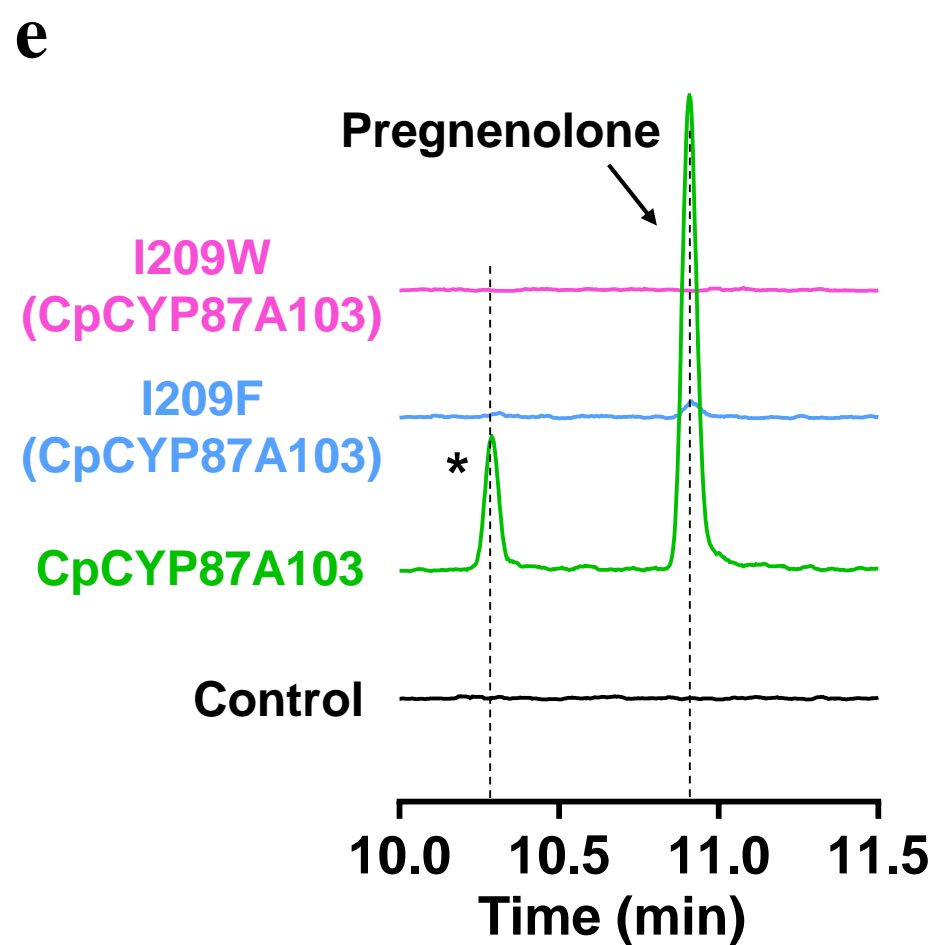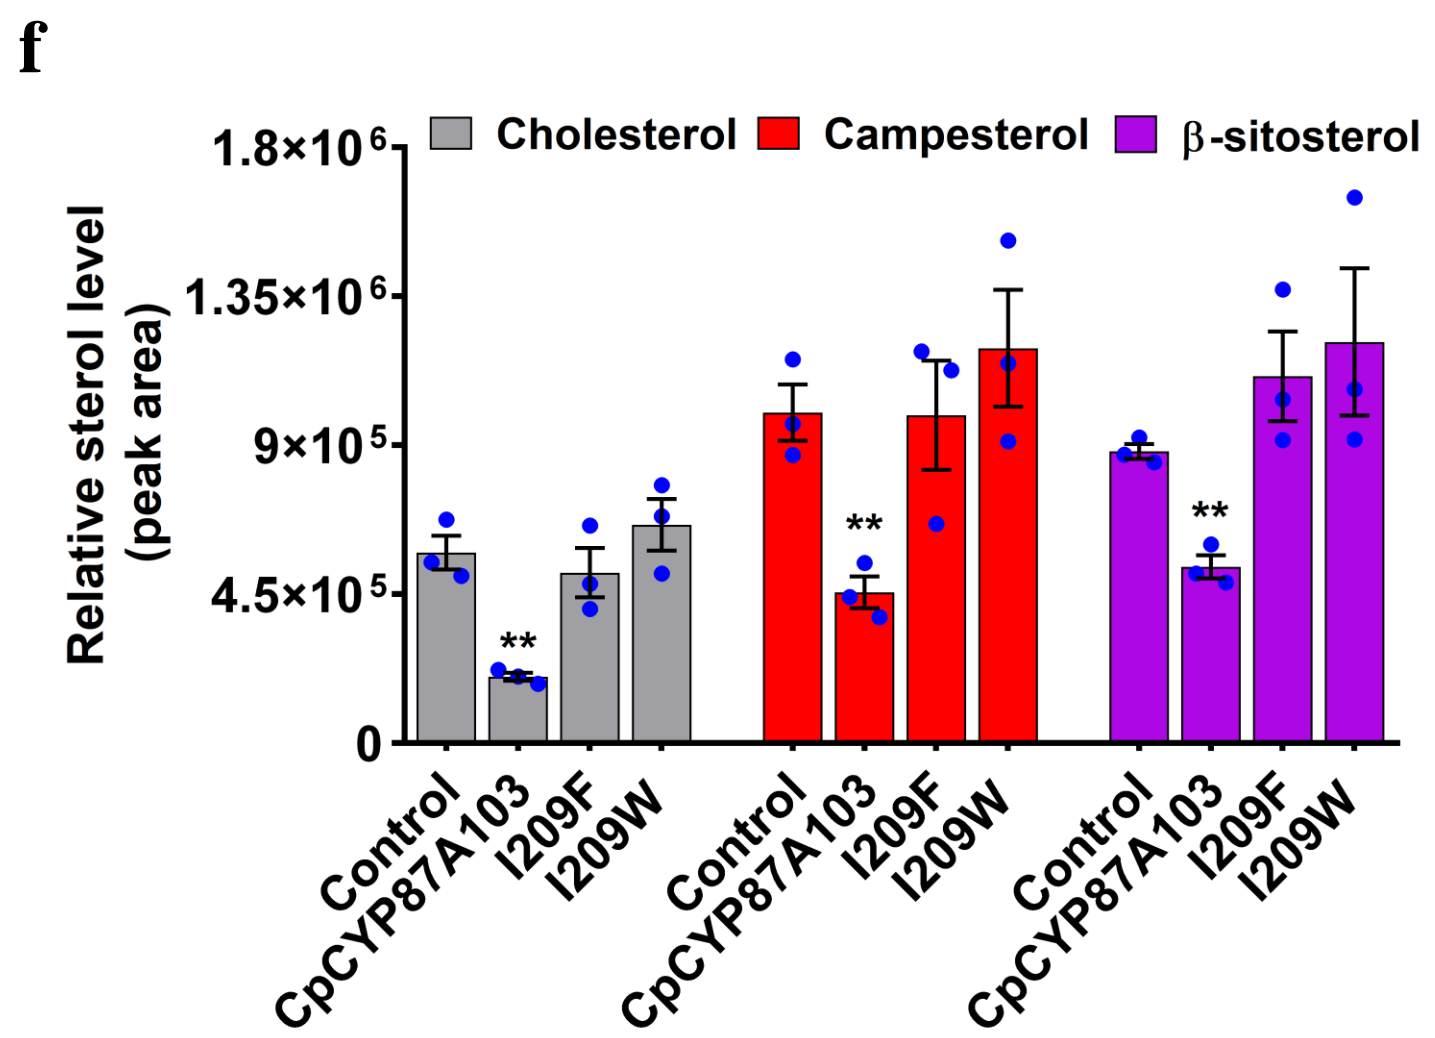



**Supplementary Fig. 12: Role of Ile210/Ile209 residue in DpCYP87A106 and CpCYP87A103 catalyzed pregnenolone formation.** (a, b) DpCYP87A106 (a) and CpCYP87A103 (b) docked with thiolate-heme and cholesterol (on left side of each panel). Dashed line shows distance of C20 to heme-thiolate cofactor. Active site of DpCYP87A106 (a) and CpCYP87A103 (b) showing steric hindrance of cholesterol substrate by Ile210Phe (upper, on right side of each panel) and Ile210Trp (lower, on right side of each panel) mutants. (c, d) pregnenolone (c) and major sterols (d) profiling in I210F and I210W mutants of DpCYP87A106 following transient expression in *N. benthamiana* leaves. (e, f) pregnenolone (e) and major sterols (f) profiling in I209F and I209W mutants of CpCYP87A103 following transient expression in *N. benthamiana* leaves. Leaves infiltrated with empty vector were used as a negative control (panel c and e, in black), while leaves infiltrated with wild type DpCYP87A106 (panel c, in red) or CpCYP87A103 (panel e, in green) were used as positive control. Asterisk (\*) shows the presence of a new compound at different retention time, having same mass spectrum as that of pregnenolone (see Fig. 2b). The values in panel (d) and (f) indicate the mean of three biological replicates  $\pm$  standard error mean (n=3). Asterisks indicate significant changes compared to control samples as calculated by two tailed Student's t-test (\*P-value < 0.05; \*\*P-value < 0.01; \*\*\*P-value < 0.001). Sterol profiling was done by GC-MS.

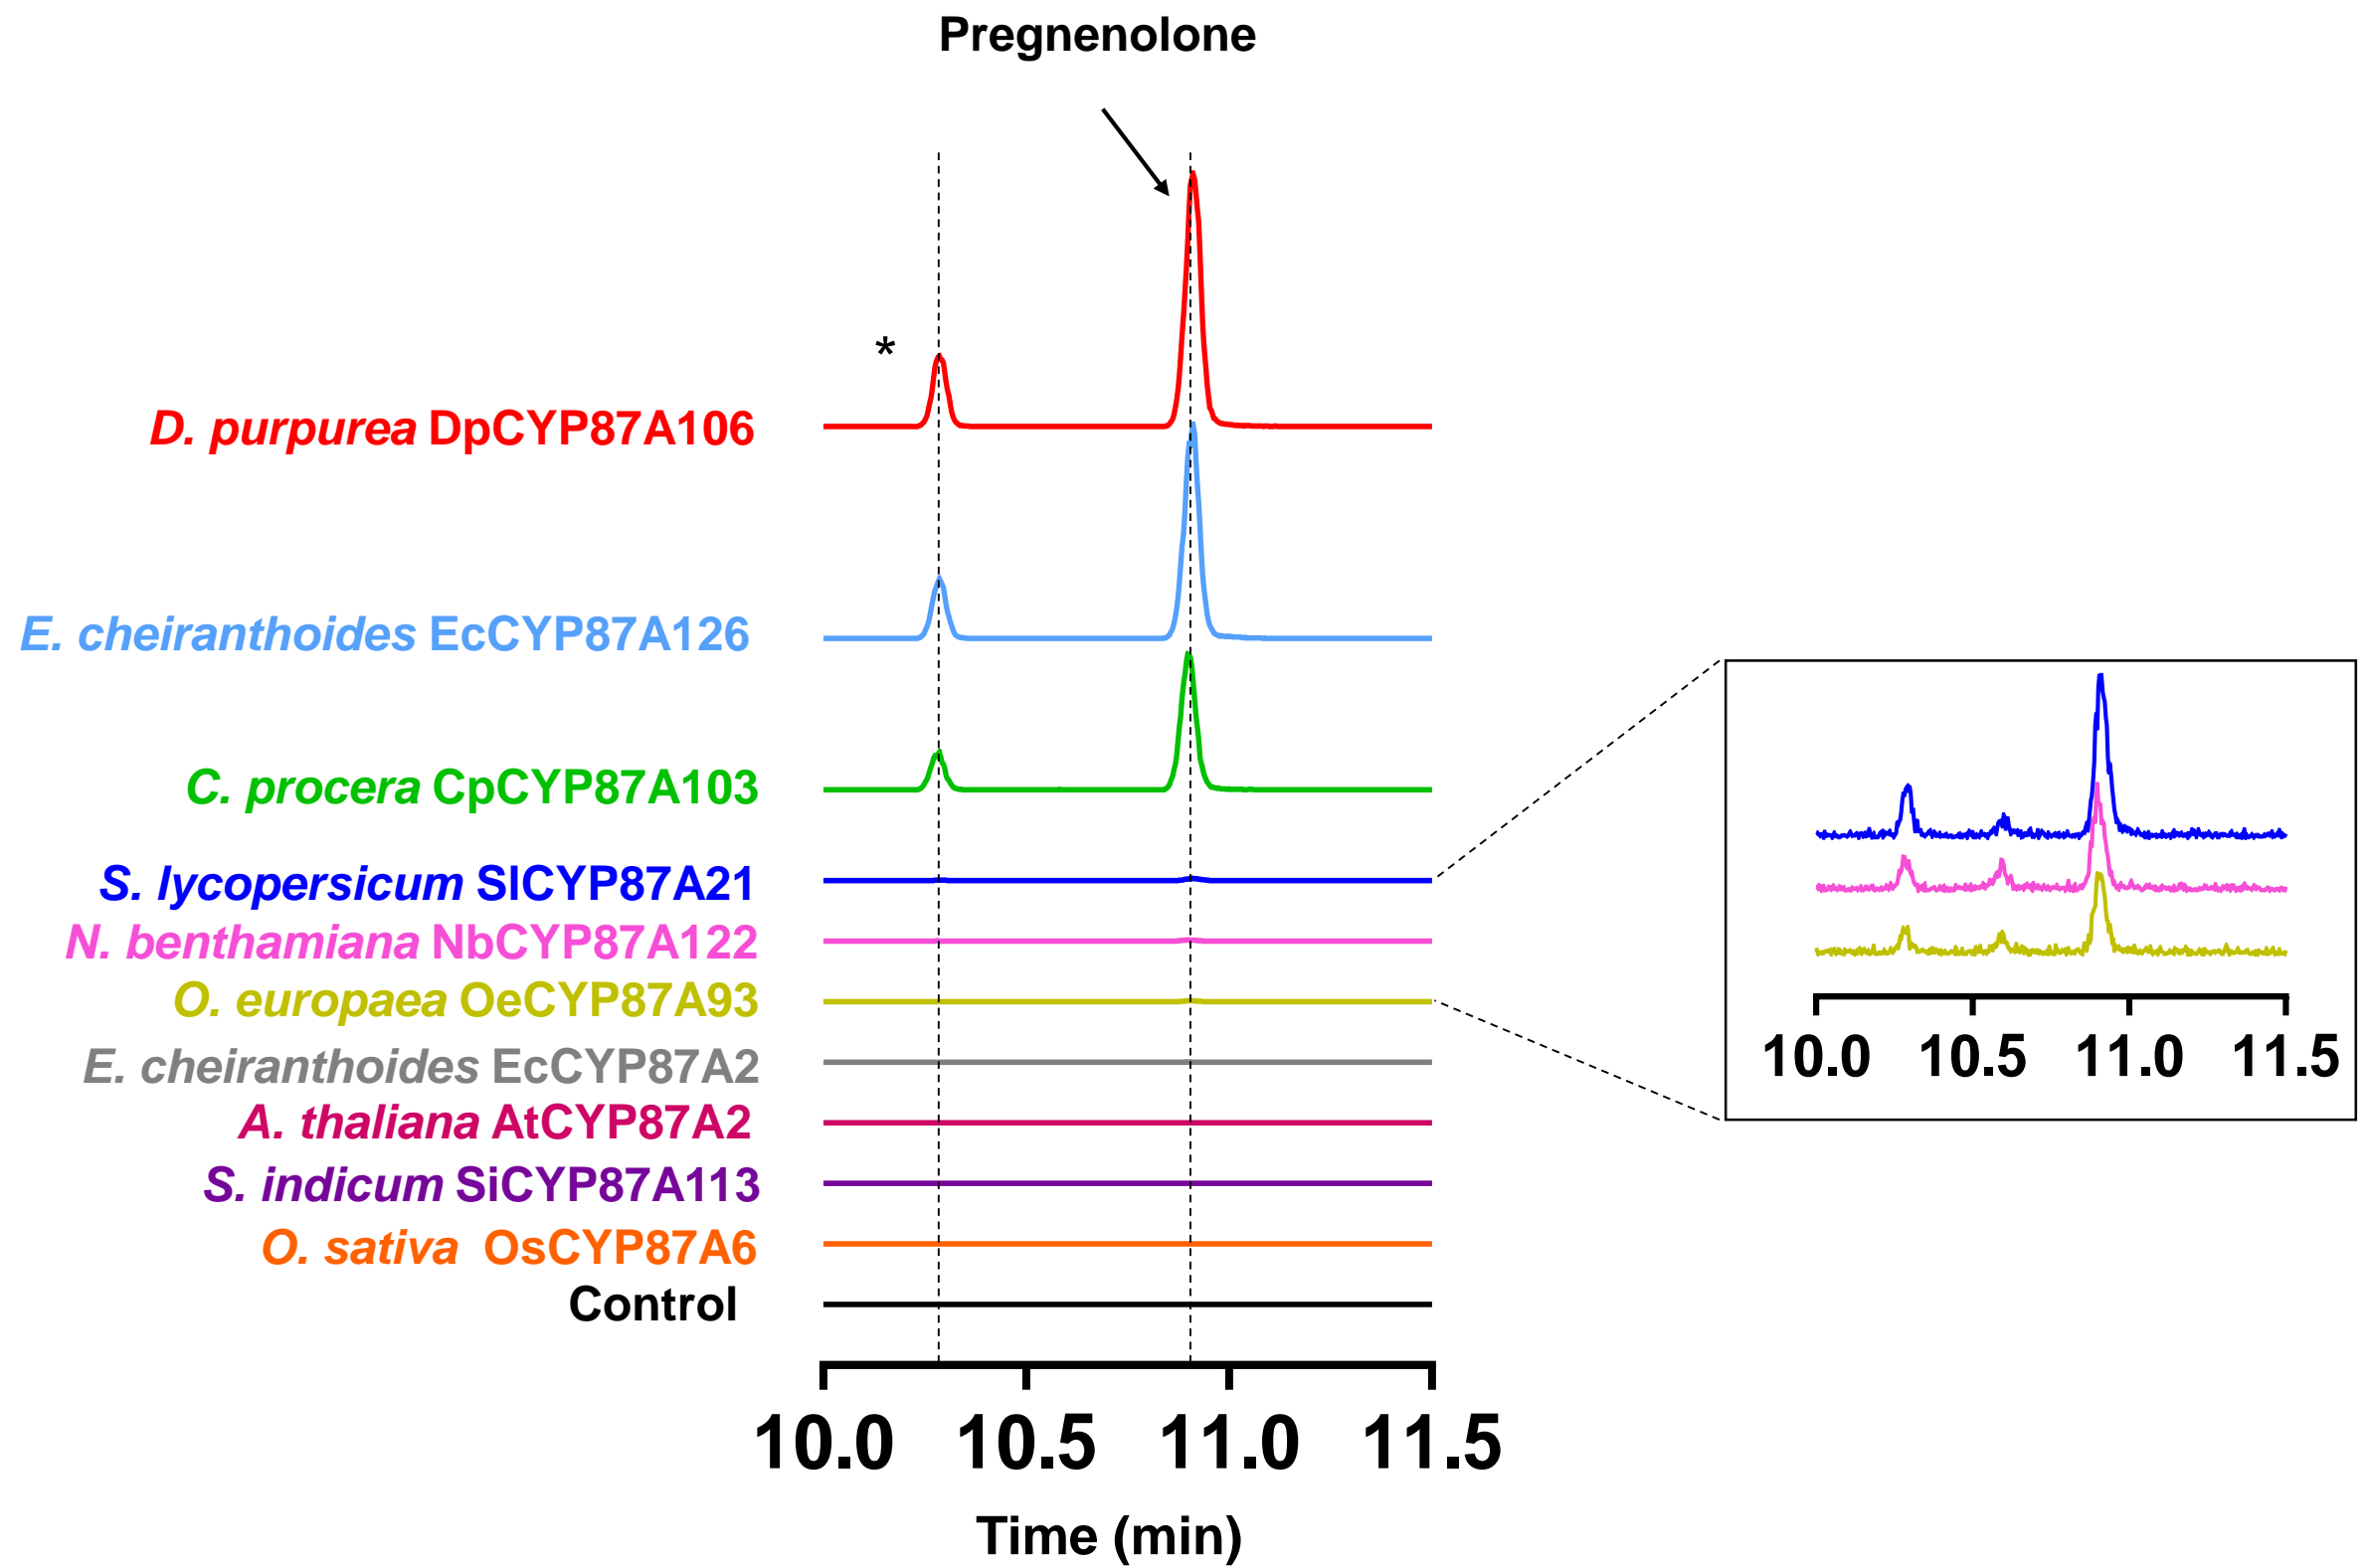

**Supplementary Fig. 13: Aligned extracted ion chromatograms (GC-MS) of pregnenolone ( $m/z$  388.2, trimethylsilylated) from *N. benthamiana* leaves extracts transiently expressing *CYP87A* genes from either cardenolide producing or cardenolide free plants.** Transient expression of three *CYP87A* genes from three cardenolide producers, namely EcCYP87A126 (*E. cheiranthoides*), DpCYP87A106 (*D. purpurea*) and CpCYP87A103 (*C. procera*) in *N. benthamiana* leaves produce high levels of pregnenolone, that typically does not accumulate in *N. benthamiana*. Leaves infiltrated with empty vector were used as a control (shown in black). Sterol profiling was done by GC-MS. Asterisk (\*) shows the presence of a new compound at different retention time, having same mass spectrum as that of pregnenolone (see Fig. 2b).
