# Supplementary material for: Promiscuous CYP87A enzyme activity initiates cardenolide biosynthesis in plants
Source: PubMed Central journal article supplement (PMC10581899; doi:10.1038/s41477-023-01515-9), 2023-09-18
Supplement: 41477_2023_1515_MOESM3_ESM.pdf [file 41477_2023_1515_MOESM3_ESM.pdf]

**Supplementary Data 1: CYP87A protein sequences from various plants used in construction of phylogenetic analysis.**

**> *Solanum lycopersicum* (SICYP87A21)**

MISVGMSIGAFILIIIIHWVYNWRNPRCNGKLPFGSMGWPLLGETIQFFTPNTTLDIAPF  
VKERMKRYGPIFRTSVVGRPVIIVSTDPDLNYFIFQQEGQSFQSWYPDTFTEIFGRQNV  
GSLHGFMYKYLKNMVLNLFGSESLKMLPEVEEVAKNKLKRWSGQTSVEMKEATAN  
MIFDLTAKKLISYDSETSSENLRESFVAFIQGLISFPIDIPGTAYHKCLQGRKKAMKMLKT  
MLEERRAKPRKEGTDFFDYVLEELQKNDIILTEAIALDLMFVLLFASFETTSLAITLATKFL  
HDHPLALKELTEEHEAIIRSRENPAAGLTWKEYKSMKFTFQVINETVRLANIVPAIFRKT  
LDINFKGYTIPAGWAVMVCPPAVHLNPAKYQDPLDFNPWRWEGVEINGATRNFMAFG  
GGMRFVCGTDFTKVQMAVFLHSLVTKYRWQTIGGGNTVVRTPGLQFPNGYHVRRISEKD  
EKIL

**> *Digitalis purpurea* (DpCYP87A106)**

MSLVAISIGAILVITNCVFKWRNRSLSSGGILPPGSFGWPLIGETLHFFTPNTSFDVTPF  
VKDRMKRYGPIFKTSLVGVPVIVSTDAELNFIQFQQEGQTFQSWYPSTFTEIFGRENLS  
TLHGFMYKYFKNMVLGLFGPELTKMISEVENTSNINLKRWSANGTVELKDAIAEMIFE  
LTAKKLISYELEKSPYNLRDNFVAFIDGLISFPLNIPGTAYYKCLQGRKNAIKMLRDMLHE  
RREKPRETQTDFFDYVLEELQKQDTIITETLALDLMFVLLFASHETASIALTLAMKFLVDH  
PLVLDKLTEEHDEIIMKREDPNSGLTWNEYKSMKFTFQFINETRLANIAPLIFRKALTE  
EFKGYTIPAGWAVMVCLPAVHLDPTKYKNPLEFNPWRWEGVDTSVGSKTFMAFGGG  
MRLCIGADFTKVQMAVFLHCLVTKYKWKTIKGGDIVRCPGLKFPNGFHVQMSEREAN  
QKACK

**> *Calotropis procera* (CpCYP87A103)**

MMFAAIFLTTFLFIIVSRWIYRWRNPNPCNGILPPGSMGLPIIGESLAYFTPYFKDDIPLFV  
RERVQKYGPLFRTSLVGQSVIVSTDPEVNYIYFQQEGNLFQCWYSESVLKVLGESQSM  
AVQAGAFHKYLKNLCLSLVGPENLKETLMYEMDQNTIEHLQSWGTTIGNLDAKDATAEL  
VFKLAARKIINYDEKKSGLKLRDCYKAFMDGFISFPLYIPGTAFYACIQGRKKALKVIKEV  
FNQRRGIGATEEKQKVFDYILEEVDNKESFITEGIALDLVFLLLFASHETTSTAMTMAM  
KFITESPAVLAELVREHEAILKNRENPESGITWKEYKGMTFTHMVINETVRIANIAPGIFR  
KVMKEVEIKGYTIPAGWTVMVCPSTVHMNPKYENPLSFDPPWRWEGQELHSASKNF  
MAFGGGMRLCVGADFAKLQMAIFLHHLVTKFRWTITHGGDTRKPGLLFPNGLHVQIS  
AIKAN

**> *Arabidopsis thaliana* (AtCYP87A2)**

MWALLIIVSLLLISITHWVYSWRNPKCRGKLPFGSMGFPLLGESIQFFKPNKTS DIPPI  
KERVKKYGPFIKTNLVGRPVIIVSTDADLSYFVFNQEGRCFQSWYPDTFTHIFGKKNVG  
SLHGFMYKYLKNMVLTLFGHDGLKKMLPQVEMTANKRLELWSNQDSVELKDATASMI  
FDLTAKKLISHDPDKSSENLRANFVAFIQGLISFPDIPGTAYHKCLQGRAKAMKMLRN  
MLQERRENPRKNPSDFFDYVIEEIQKEGTILTEEIALDLMFVLLFASFETTSLALTLAIKFL  
SDDPEVLKRLTEEHETILRNREDADSGLTWEEYKSMTYTFQFINETARLANIVPAIFRKA

LRDIKFKDYTIPAGWAVMVCPPAVHLNPEMYKDPLVFNPSRWEGSKVTNASKHFMAF  
GGGMRFCVGTDFTKLQMAAFLHSLVTKYRWEEIKGGNITRTPGLQFPNGYHVKLHKK  
RD

> ***Nicotiana benthamiana* (NbCYP87A122)**

MISVGMCI GAFLVLIHVVYNWRNPRCNGKLP PGSMGWPLLGETIPFFAPNTSSDIAPF  
VKDRMQRYGPIFRTSVVGRPVIASTDPDLNYFIFQQEGQLFQSWYPDTFTEIFGKQNV  
GSLHGFMKYKLNMLNLF GPESLKKMMPEVEEAAKNKLRW SGQTSVEMKEATAN  
MIFDLTAKKLISYDSENSENLR ESFVAFIQGLISFPIDIPGTVYHKCLQGRKKAMKMLKT  
LLEERRAKPRKEQSDFFDYVLEELQRKDTILTEAIALDLMFVLLFASFETTSLAITLATKF  
LHDHPLALKELEEHEAIRRREN PASGLTWKEYKSMKFTFQVINETVRLANIVPAIFRK  
ALRDVNFKGYTIPAGWAIMVCPPAVHLNPAKYQDPLEFNPWRWEGVEMNGASRNFM  
AFGGMRFCVGTDFTKVQMAVFLHSLVTKYRWETIQGGDTLRTPGLQFPNGYHIRLS  
EKDEKIQ

> ***Erysimum cheiranthoides* (EcCYP87A2)**

MWALFIWVSLLLISITHWVYSWRNPKCRGKLP PGSMGFPLLGETIQFFKPNTSSDIPFFI  
KERVKKYGSIFKTNLVGRPVI VSTDADLSYFVFQQEGRCFQSWYPDTFTKIFGEKNVG  
SLHGFMKYKLSMVLTLFGHDGLKKMLPQVEMTANKRLELWSNQDSVELKDATASMI  
FYLTAKKLISHDPDKSSENLRANFVAFIQGLISFPDIPGTAYHKCLQGREGAMKMLRN  
MLQERRKKPRKYP SDFFDYVILEIQKEGTILTEEIALDLMFVLLFASFETTSLAITLAIKFLS  
DDPAVLKRLTEEHETILRNREDADSGLTWEEYKSMTYTFQFINETARLANIVPAIFRKAL  
RDIKFKDYTIPAGWAVMVCPPAVHLNSETYKDPLVFNPSRWEGSKATNASKHFMAFG  
GGMRFCVGTDFTKLQMAAFLHCLVTKYRWEEIKGGNILRTPGLQFPNGYHVRLHKKE  
T

> ***Erysimum cheiranthoides* (EcCYP87A126)**

MSWALCIWVSLVVTGITT LVYKWRNPKCSGKLP PGSMGLPLLGETIQFFKPNTSDIQP  
FIKERTKKYGPIFKTSLVGKSIIVTTDPDFSYFVFQQEGQSFQSWYPDTFVEIFGKQNLG  
ALHGIIYKYLKHMVLSLFGFESLKNMLPEIEQTACKKLDLWSTQKSIELKESTANLIFDLT  
AKKLISHDEEKSENLRDNYVAFIDGLISFPINLPGTAFYKCLKGRERVMSLRNMLKER  
RKNPRKVASDFFDYVIEELKKEGTMLTESIALDLMFVLLFASFETTSLAITVAIKMLSDHP  
SVLKRLTEEHAILRNRKDPNSGLTWEEYKSMTYTFQFMNETARLANIAPLICRKALKDI  
QYKNYTIPANWPVMVPPAIHLDPNNYEDPLVFNPSRWEGSEFTNASKKFMAFGGGM  
RFCIGTDFSKLQTA VFLHSLTKYSWEHISGGNMLRSPGLQFPNGYHVKINKKEI

> ***Oryza sativa* (OsCYP87A6)**

MOPYLQLASRLATTIPLAPRLYDANLLAASGAAMASSMAYIALLCALA AVVALLRWA  
YRWSHPRSNGRLPPGSLGLPVIGETLQFFAPNPTCDLSPFVKERIKRYGSIFKTSVGR  
PVVVSADPEMNYVVFQQEGKLFESWYPDTFTEIFGRDNVGS LHGFMKYKLT LVLRLY  
GQENLKS VLLAETDAACRGLASWASQPSVELKEGISTMIFDLTAKKLIGYDPSKPSQV  
NLRKNFGAFICGLISFPLNIPGTAYHECMEGRKNAMKVL RGMKMERMAEPERPCEDFF  
DHVIQELRREKPLLTETIALDLMFVLLFASFETTALALTIGVKLLTENPKVVDALREEHEAI

IRNRKDPNSGVTWAEYKSMTFTSQVIMEIVRLANIVPGIFRKALQDVEIKGYTIPAGWGI  
MVCPPAVHLNPEIYEDPLAFNPWRWQGKPEITGGTKHFMAFGGGLRFCVGTDLKVL  
MATFIHSLVTKYSWRTVKGGNIVRTPGLSFPDGFHIQLFPKN

> ***Sesamum indicum* (SiCYP87A113)**

MFPAAFYIGALLIIAITNWLYHWRNPRCNGVLPPGSMGWPLIGETLQFFAPNTSSDIPPF  
VKQRMQRYGPVFKTSLVGRPVIIVSTDADLNYFIFQQEGQLFQSWYPDTFTEIFGRQNV  
GSLHGFMYKYLKNMVLNLFGPESLKKMLPEVEQASNRNLEKWTSSQIVEVKEATAKMI  
FELTAKKLISYDSEKSTENLRENFVAFIQGLISFPVDIPGTAYHKCLQGRKKAMKMLKNM  
LQERRERPRKVRTDFFDYVLEELQREDTLLTEAIALDLMFVLLFASFETTSLALTLATKF  
LVEHPLVLKELTEEHEAIIKRRENPDGLTWSEYKSMRFTFQFINETVRLANIVPGIFRK  
AMRETKFKGYTIPAGWAIMVCPVAVHLDPKKYRDPLNFPWRWEGIDTNGASRNFMFA  
FGGGMRFVGTDFTKVQMAVFLHCLVTKYKWKAIKGGDILRTPGLQFPNGFHVHVTE  
KDK

> ***Olea europaea* (OeCYP87A93)**

MFPAIFCIAAILVINITHWLYKWWNPDCNGVLPPGSMGWPLLGETLHFFAPNTSSDIPP  
FVKERIHRYGPIFKTSLVGRPVIIVSTDADLNYFIFQQEGQLFESWYPSTFVEIFGRQNVG  
SLHGFMYKYLKNMVLNLFGPESLKKMLPDVEQASNIYLKRWSSQTMTEMKESTSKMIF  
DLTAKKLISYDVEKSSDNLKRNFKAFIKGLISFPLNIPGTAYHKCLQGRKKAMKMLKSML  
QERRERPRKFQSDFFDYVLEELQRQDTILTESIGLDLMFVLLFASHETTSLALTLAMKFL  
SDHPLVLKELTEEHEAIIKKREIPDGLTWNEYKSMKFTFQFINETVRLANIVPGIFRKAL  
KDIKFKGHTIPAGWAVMVCPPAVHLNPAKYSNPLDFNPWRWEGVDTNGASRNFMFAF  
GGGMRFVGTDFTKVQMAIFLHCLVTKYKWQAIAKGGDIVRTPGLQFPNGFHISLSEKN  
AQK

> ***Homo sapiens* CYP11A1**

MLAKGLPPRSVLVKGCQTFLSAPREGLGRLRVPTGEGAGISTRSPRPFNEIPSPGDNG  
WLNLYHFWRETGTHKVHLHHVQNFQKYGPIYREKLGNVESVYVIDPEDVALLFKSEGP  
NPERFLIPPWVAYHQYYQRPIGVLLKKSAAWKKDRVALNQEVMAPKATKNFLPLLDVAV  
SRDFVSVLHRRIKKAGSGNYSGDISDDLFRFAFESITNVIFGERQGMLEEVVNPEAQR  
IDAIYQMFHTSVPMNLNPPDLFRLFRKTWVDHVAAWDVIFSKADIYTNFYWELRQK  
GSVHHDYRGILYRLLGDSKMSFEDIKANVTEMLAGGVDTTSMTLQWHLIYEMARNLKV  
QDMLRAEVLAARHQAQGDMAATMLQLVPLLKASIKETLRLHPISVTLQRYLVNDLVLRDY  
MIPAKTLVQVAIYALGREPTFFFDPENFDPTRWLSKDKNITYFRNLGFGWGVQRCLGR  
RIAELEMTIFLINMLENFRVEIQHLSDVGTTFNLILMPEKPISTFWPFNQEATQQ
